# Supplementary material for: Overall Survival Benefits of Cancer Drugs Approved in China From 2005 to 2020
Source: PubMed Central journal article supplement (PMC9366546; doi:10.1001/jamanetworkopen.2022.25973), 2022-08-10
Supplement: jamanetwopen-e2225973-s001.pdf [file jamanetwopen-e2225973-s001.pdf]

## Supplementary Online Content

Zhang Y, Naci H, Wagner AK, et al. Overall survival benefits of cancer drugs approved in China from 2005 to 2020. *JAMA Netw Open*. 2022;5(8):e2225973.

doi:10.1001/jamanetworkopen.2022.25973

**eTable 1.** Landmark Regulatory Policies Concerning Drug Approvals in China, 2009-2020

**eFigure 1.** Identification of Sample Indications

**eBox 1.** Key Words and Research Strategy to Identify Peer-Reviewed Publications of Drug Trials

**eTable 2.** Outcome Variables Extracted From Trials

**eTable 3.** Classification of Overall Survival (OS) Benefit

**eBox 2.** Key Words and Research Strategy to Identify Peer-Reviewed Publications of Correlations Between Surrogate End Points and Overall Survival

**eTable 4.** Sources of Information

**eFigure 2.** Approval Year of Indications Supported Only by Single-Arm or Dose-Optimization Trials

**eFigure 3.** Classification of Overall Survival (OS) Benefit for Cancer Indications Approved in China, by Approval Year

**eTable 5.** Line of Therapy of Cancer Indications of Drugs Approved in China Only and Drugs Also Approved in the United States or the European Union

**eTable 6.** Classification of Overall Survival and ESMO-MCBC Score of Cancer Drugs

**eTable 7.** Magnitude of Documented Overall Survival (OS) Benefit for 68 Indications, by Cancer Type

**eTable 8.** Results of Pivotal Trials Supporting 34 Indications With Documented Lack of Statistically Significant Overall Survival (OS) Benefit

**eTable 9.** Primary End Point and Time From Enrollment to Approval of 13 Indications With Unknown Overall Survival Data by June 30, 2021

**eTable 10.** Results of Single-Arm or Dose-Optimization Trials Supporting Approvals by China National Medical Products Administration, 2005-2020

**eTable 11.** Published Surrogate Correlation Studies for Cancer Indications Without Documented Overall Survival Benefit

**References.**

This supplementary material has been provided by the authors to give readers additional information about their work.

## Summary of regulatory policy changes in China, 2005-2020

**eTable 1. Landmark Regulatory Policies Concerning Drug Approvals in China, 2009-2020**

| Effective Date | Issuing Organization | Policy Title                                                                                                                           | Main Policy Content                                                                                                                                                                                                                                                                                                                                                                                                                                                                                                                                                                                                                                                                                                                                                                                                                                   |
|----------------|----------------------|----------------------------------------------------------------------------------------------------------------------------------------|-------------------------------------------------------------------------------------------------------------------------------------------------------------------------------------------------------------------------------------------------------------------------------------------------------------------------------------------------------------------------------------------------------------------------------------------------------------------------------------------------------------------------------------------------------------------------------------------------------------------------------------------------------------------------------------------------------------------------------------------------------------------------------------------------------------------------------------------------------|
| Jan, 2009      | SFDA                 | Regulations on the Special Review for New Drug Registration                                                                            | Put forward <i>Special Review</i> program, aiming to encourage new drug R&D. For conditions without effective treatments, such as AIDS, cancers, and rare diseases.                                                                                                                                                                                                                                                                                                                                                                                                                                                                                                                                                                                                                                                                                   |
| Feb, 2013      | CFDA                 | Strengthening the Reform of Drug Review and Approval and Further Encouraging Innovation                                                | To promote drug regulatory reform, improve review efficiency, and encourage R&D of novel drugs and generic drugs with clinical value.<br>Put forward principles of <i>Accelerated Review</i> and <i>Priority Review</i> programs.<br>Proposed to strengthen the quality management of drug clinical trials and encourage the development of drugs for children.                                                                                                                                                                                                                                                                                                                                                                                                                                                                                       |
| Aug, 2015      | The State Council    | Opinions of the State Council on Reform of the System for Evaluation, Review and Approval of Drugs and Medical Devices (No. 44 [2015]) | Put forward the primary goals and missions of regulatory system reform, and measures to ensure its implementation.<br>Primary goals: to improve review quality, resolve drug registration backlog, improve quality of generic drugs, encourage new drug R&D, and improve review transparency.                                                                                                                                                                                                                                                                                                                                                                                                                                                                                                                                                         |
| Feb, 2016      | CFDA                 | Resolving the Backlog of Drug Registration Applications and Implementing Priority Review and Approval                                  | Implemented <i>Priority Review</i> program.<br><ul style="list-style-type: none"> <li>• Rolling review and shorter clock for review of marketing application</li> <li>• Drugs for serious or life-threatening diseases, with early clinical evidence and surrogate endpoint that is reasonably likely to predict clinical benefit could get market authorization under <i>Conditional Approval</i>.</li> </ul> Certain drugs with clinically meaningful benefit and drugs intended to treat specific diseases were eligible for <i>Priority Review</i> , including: <ul style="list-style-type: none"> <li>• New drugs did not been approved in China or other countries, etc.;</li> <li>• Drugs to treat AIDS, viral hepatitis, rare diseases, cancers, pediatric conditions, specific and frequent diseases of older adults, and others.</li> </ul> |

| Effective Date | Issuing Organization                                                                     | Policy Title                                                                                                                                                                                       | Main Policy Content                                                                                                                                                                                                                                                                                                                                                                                                                                                                                                                                                                                                                                                                                                                                                                                                               |
|----------------|------------------------------------------------------------------------------------------|----------------------------------------------------------------------------------------------------------------------------------------------------------------------------------------------------|-----------------------------------------------------------------------------------------------------------------------------------------------------------------------------------------------------------------------------------------------------------------------------------------------------------------------------------------------------------------------------------------------------------------------------------------------------------------------------------------------------------------------------------------------------------------------------------------------------------------------------------------------------------------------------------------------------------------------------------------------------------------------------------------------------------------------------------|
| Oct, 2017      | General Office of the CPC Central Committee, and the General Office of the State Council | Opinions of the CPC Central Committee and the State Council on Deepening the Reform of the Evaluation and Approval Systems and Encouraging Innovation on Drugs and Medical Devices (No. 42 [2017]) | <p>Put forward the primary goals to strengthen the regulatory system reform on the basis of <i>No. 44 [2015]</i> and previous work: to encourage innovation, improve industry competitiveness, and meet public clinical needs.</p> <p>Specific opinions:</p> <ul style="list-style-type: none"> <li>• Reforming clinical trial management;</li> <li>• Accelerating drug and medical devices review and approval;</li> <li>• Encouraging drug innovation and the development of generic drugs;</li> <li>• Strengthening the whole life cycle management of drugs and medical devices;</li> <li>• Improving technical support capabilities;</li> <li>• Strengthening relevant organization and implementation.</li> </ul>                                                                                                           |
| Dec, 2017      | CFDA                                                                                     | Encouraging Drug Innovation and Implementing Priority Review and Approval                                                                                                                          | <p>Revised <i>Priority Review</i> program, aiming to encourage drug innovation. A drug with clinically meaningful benefit, or a drug intended to treat specific diseases was eligible for <i>Priority Review</i> (revised):</p> <ul style="list-style-type: none"> <li>• New drugs that did not launch in or outside China, and new drugs for which clinical trials were carried out by the National Clinical Medical Research Centre, and others</li> <li>• Drugs to treat AIDS, viral hepatitis, rare diseases, cancers, pediatric conditions, specific and frequent diseases of older adults, and others;</li> <li>• In the case of a major threat to public health, the drug registration application that has obtained a compulsory license will be given <i>Priority Review</i> and approval.</li> <li>• Others.</li> </ul> |
| Dec, 2017      | CFDA                                                                                     | Publicly Solicit Comments on the <i>Technical Guidance for the Conditional Approval of Clinically</i>                                                                                              | <p>Soliciting public comments for the <i>Technical Guidance for the Conditional Approval of Clinically Urgently Needed Drugs</i>, to accelerate the approval of urgently needed drugs with clinical value.</p> <p><i>Conditional Approval:</i></p>                                                                                                                                                                                                                                                                                                                                                                                                                                                                                                                                                                                |

| Effective Date | Issuing Organization | Policy Title                                                                                                                          | Main Policy Content                                                                                                                                                                                                                                                                                                                                                                                                                                                                                                                                                                                                                                                                                               |
|----------------|----------------------|---------------------------------------------------------------------------------------------------------------------------------------|-------------------------------------------------------------------------------------------------------------------------------------------------------------------------------------------------------------------------------------------------------------------------------------------------------------------------------------------------------------------------------------------------------------------------------------------------------------------------------------------------------------------------------------------------------------------------------------------------------------------------------------------------------------------------------------------------------------------|
|                |                      | <i>Urgently Needed Drugs</i> (Draft for Comments)                                                                                     | <ul style="list-style-type: none"> <li>• A drug for serious or life-threatening diseases that have no available therapy;</li> <li>• Approval based on surrogate endpoints or preliminary clinical trial evidence that is reasonably likely to predict clinical benefit.</li> </ul>                                                                                                                                                                                                                                                                                                                                                                                                                                |
| Jul, 2018      | NMPA                 | Announcement of the NMPA on Issuing the <i>Technical Guidance for Accepting Overseas Clinical Trial Data</i>                          | Implemented the opinions put forward in <i>No. 42 [2017]</i> , aiming to strengthen the guidance and standardization of the procedure of accepting overseas clinical trials.                                                                                                                                                                                                                                                                                                                                                                                                                                                                                                                                      |
| Nov, 2018      | NMPA                 | Notice on the Issuance of the First Batch of Clinically Urgently Needed Overseas New Drugs                                            | Listed 40 drugs approved overseas, for which clinically urgently needs were identified in China, including 8 cancer drugs.                                                                                                                                                                                                                                                                                                                                                                                                                                                                                                                                                                                        |
| Mar, 2019      | NMPA                 | Notice on the Issuance of the Second Batch of Clinically Urgently Needed Overseas New Drugs                                           | Listed 26 drugs approved overseas for which clinically urgently needs were identified in China, including 2 cancer drugs.                                                                                                                                                                                                                                                                                                                                                                                                                                                                                                                                                                                         |
| Jul, 2020      | NMPA                 | Announcement of the NMPA on Issuing the <i>Regulatory Review Procedures of Breakthrough Therapy (Trial)</i> and other three documents | <p>Implemented <i>Breakthrough Therapy</i> designation, aiming to encourage R&amp;D of drugs with clinically meaningful benefits.</p> <p><i>Breakthrough Therapy (pilot):</i></p> <ul style="list-style-type: none"> <li>• For a drug intended to treat a serious condition, where there is no available therapy, or the drug has an improved effect compared to available therapy;</li> <li>• Preliminary clinical evidence that suggests substantial improvement over existing therapies.</li> </ul> <p>Revised <i>Priority Review</i> and <i>Conditional Approval</i> program, aiming to accelerate approval of drugs with clinically meaningful benefits.</p> <p><i>Priority Review</i> (revised, pilot):</p> |

| Effective Date | Issuing Organization | Policy Title                                                                               | Main Policy Content                                                                                                                                                                                                                                                                                                                                                                                                                                                                                                                                                                                                                                                                                                                                                                                                                                                                                                                                                                                                                                                                                                                                                                                  |
|----------------|----------------------|--------------------------------------------------------------------------------------------|------------------------------------------------------------------------------------------------------------------------------------------------------------------------------------------------------------------------------------------------------------------------------------------------------------------------------------------------------------------------------------------------------------------------------------------------------------------------------------------------------------------------------------------------------------------------------------------------------------------------------------------------------------------------------------------------------------------------------------------------------------------------------------------------------------------------------------------------------------------------------------------------------------------------------------------------------------------------------------------------------------------------------------------------------------------------------------------------------------------------------------------------------------------------------------------------------|
|                |                      |                                                                                            | <ul style="list-style-type: none"> <li>• Novel drugs for diseases for which there are clinically urgent needs, major infectious diseases and rare diseases;</li> <li>• New varieties, dosage forms and specifications of childhood drugs;</li> <li>• Vaccines urgently needed for disease prevention and control;</li> <li>• Drugs designated as <i>Breakthrough Therapy</i>;</li> <li>• Drugs eligible for <i>Conditional Approval</i>;</li> </ul> <p><i>Conditional Approval</i> (revised, pilot):</p> <ul style="list-style-type: none"> <li>• Drugs for the treatment of serious life-threatening diseases for which there are no effective available therapies and with clinical trials that have confirmed efficacy and can predict the drugs' clinical value;</li> <li>• Drugs that are urgently needed in public health, and that have clinical trials that have shown efficacy and can predict the clinical benefit of the drugs;</li> <li>• Vaccines that are urgently needed in response to major public health emergencies or other vaccines that are determined to be urgently needed by the National Health Commission, whose benefits outweigh the risks after assessment.</li> </ul> |
| Nov, 2020      | NMPA                 | Notice on the Issuance of the Third Batch of Clinically Urgently Needed Overseas New Drugs | Listed 7 drugs approved overseas for which there are clinically urgently needs in China, including 2 cancer drugs.                                                                                                                                                                                                                                                                                                                                                                                                                                                                                                                                                                                                                                                                                                                                                                                                                                                                                                                                                                                                                                                                                   |

**Abbreviations:** CPC, the Communist Party of China; SFDA, State Food and Drug Administration; CFDA, China Food and Drug Administration; NMPA, National Medical Products Administration; R&D, research and development.

## Methods

### eFigure 1. Identification of Sample Indications

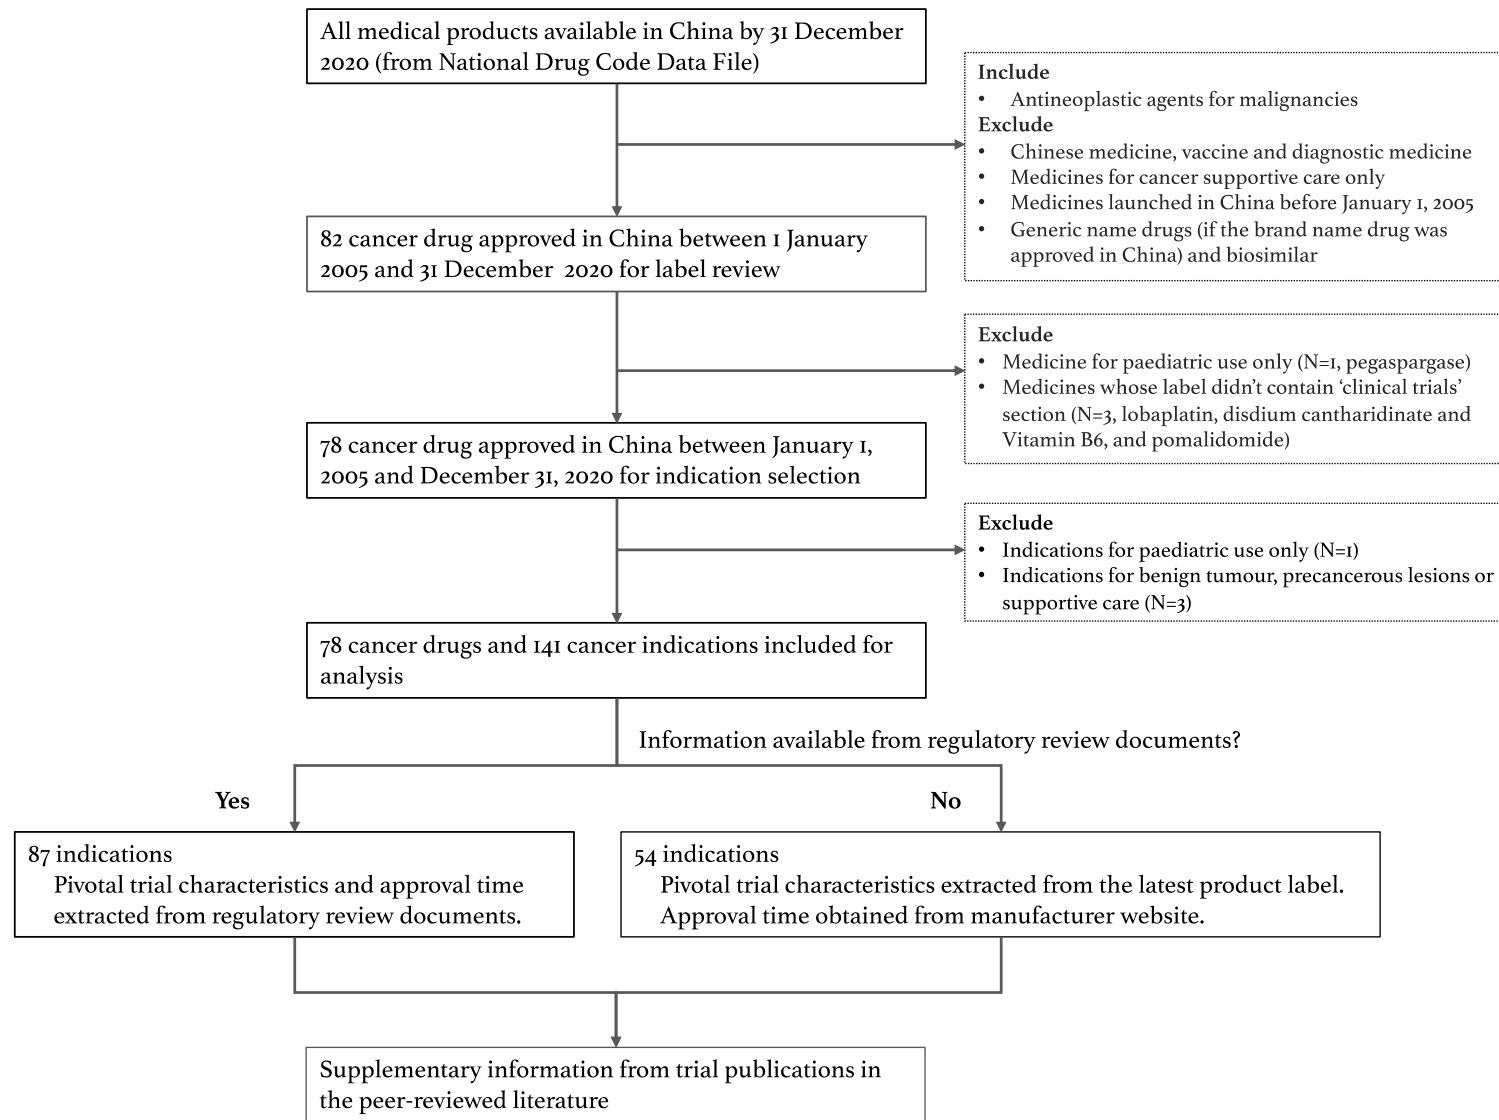

## **eBox 1. Key Words and Research Strategy to Identify Peer-Reviewed Publications of Drug Trials**

### **Key words**

#1 NCT number

#2 CTR number

#3 Study name

#4 Generic name

#5 Approved indications (when necessary)

#6 "1900/1/1"[Date - Publication] : "2021/6/30"[Date - Publication]

### **Research strategies**

PubMed: (#1 OR (#3 & #4 [Title/Abstract]) OR (#4 & #5 [Title/Abstract])) AND #6

CNKI: #2 OR #3 OR #4

Clinicaltrial.gov #1 OR #2 OR #3

*Note: CTR, Clinical Trial Registration; CNKI, China National Knowledge Infrastructure.*



**eTable 2. Outcome Variables Extracted From Trials**

| <b>Endpoints (Abbreviation)</b>                | <b>Definition</b>                                                                                                                                                                                      |
|------------------------------------------------|--------------------------------------------------------------------------------------------------------------------------------------------------------------------------------------------------------|
| <b>Survival related endpoint</b>               |                                                                                                                                                                                                        |
| Overall survival (OS)                          | The time from randomization to death from any cause.                                                                                                                                                   |
| Progression-free survival (PFS)                | The time from randomization to disease progression or death determined by Response Evaluation Criteria in Solid Tumors (RECIST) or other guidelines.                                                   |
| Disease-free survival (DFS)                    | The time from randomization to disease recurrence, new cancer occurrence, or death from any cause.                                                                                                     |
| Relapse-free survival (RFS)                    | The time from randomization to disease recurrence or death from any cause.                                                                                                                             |
| <b>Tumor response</b>                          |                                                                                                                                                                                                        |
| Objective response rate (ORR)                  | The percentage of patients who have complete response or partial response according to RECIST or other guidelines.                                                                                     |
| Disease control rate (DCR)                     | The percentage of patients who have complete response, partial response, stable disease or no evidence of disease according to RECIST guidelines or other criteria; also called clinical benefit rate. |
| <b>Response rate of hematologic malignancy</b> |                                                                                                                                                                                                        |
| Major cytogenetic response (MCyR)              | Complete (0 percent Ph-chromosome–positive cells in metaphase in bone marrow) or partial (1 to 35 percent Ph-chromosome–positive cells in metaphase).                                                  |

**eTable 3. Classification of Overall Survival (OS) Benefit**

| Type                                                                                                                                                                                    | Example                                                                                                                                                                                                                                                                                                                                                                                                                                                                  |
|-----------------------------------------------------------------------------------------------------------------------------------------------------------------------------------------|--------------------------------------------------------------------------------------------------------------------------------------------------------------------------------------------------------------------------------------------------------------------------------------------------------------------------------------------------------------------------------------------------------------------------------------------------------------------------|
| <b>1. Documented OS benefit</b>                                                                                                                                                         |                                                                                                                                                                                                                                                                                                                                                                                                                                                                          |
| 1.1 Overall survival (OS) in the intervention group was statistically significantly longer than that in the comparison group in the pre-planned analysis                                | e.g., In COU-AA-301 (NCT00638690), pivotal trial of abiraterone (1st-line, metastatic castration-resistant prostate cancer), median OS was 15.8 months vs 11.2 months in abiraterone acetate group and placebo group (HR=0.74, p<0.0001). <sup>1</sup>                                                                                                                                                                                                                   |
| 1.2 OS in the intervention group was statistically significantly longer than that in the comparison group in pre-planned analysis on subgroup consistent with the indication population | e.g., In LUX-Lung 6 (NCT01121393), pivotal trial of afatinib (1st-line, EGFR mutation-positive lung cancer), median OS was 23.1 months in the afatinib group and 23.5 months in the gemcitabine-cisplatin group (HR 0.93, p=0.61). However, in pre-planned analyses, overall survival was significantly longer for patients with del19-positive tumors in the afatinib group than in the chemotherapy group: 31.4 months vs 18.4 months (HR=0.64, p=0.023). <sup>2</sup> |
| 1.3 OS in the intervention group was statistically significantly longer than that in the control group after adjusting for the crossover                                                | e.g., In VEG105192 (NCT00334282), pivotal trial of pazopanib (1st-line and 2nd-line, advanced and/or metastatic renal cell carcinoma), the difference in final OS between pazopanib- and placebo-treated patients was not statistically significant (22.9 vs 20.5 months, HR=0.91, one-sided P = .224). In inverse probability of censoring weighted analyses, pazopanib decreased mortality (HR=0.504, two-sided P = .002). <sup>3</sup>                                |
| <b>2. Documented lack of OS benefit</b>                                                                                                                                                 |                                                                                                                                                                                                                                                                                                                                                                                                                                                                          |

| Type                                                                                                                                                                    | Example                                                                                                                                                                                                                                                                                                                                                                                                                                                                                                                                       |
|-------------------------------------------------------------------------------------------------------------------------------------------------------------------------|-----------------------------------------------------------------------------------------------------------------------------------------------------------------------------------------------------------------------------------------------------------------------------------------------------------------------------------------------------------------------------------------------------------------------------------------------------------------------------------------------------------------------------------------------|
| 2.1 Final OS in the intervention group shows no statistically significant positive difference from or is less than in the comparison group                              | e.g., In ICOGEN (NCT01040780), pivotal trial of icotinib (1st-line, EGFR mutation lung cancer), there is no significant difference in median OS data between iconitib and gefitinib (13.3 vs 13.9 months, HR=1.02, p=0.57). <sup>4</sup>                                                                                                                                                                                                                                                                                                      |
| 2.2 If final OS data is not mature, the latest estimated OS data showed no statistically significant difference between the intervention group and the comparison group | e.g., In SPARTAN (NCT01946204), pivotal trial of apalutamide (1st-line, nonmetastatic castration-resistant prostate cancer), there is no significant difference in estimated median OS data (not reached vs 39.0 months, HR=0.70, p=0.07). <sup>5</sup><br>e.g. In COMBI-AD (NCT01682083), pivotal trials of dabrafenib (adjuvant therapy, melanoma), the 3-year overall survival rate was 86% vs 77% (HR=0.57, p=0.0006), but this level of improvement did not cross the prespecified interim analysis boundary or P=0.000019. <sup>6</sup> |
| <b>3. Unknown OS benefit</b>                                                                                                                                            |                                                                                                                                                                                                                                                                                                                                                                                                                                                                                                                                               |
| 3.1 None of the pivotal trials documented OS benefit data                                                                                                               | e.g., In FESTnd Study (NCT02204644), pivotal trial of flumatinib (1st-line, newly diagnosed chronic-phase chronic myeloid leukemia), in the latest result published in Sep 2020, OS benefit between flumatinib and imatinib was not mentioned. <sup>7</sup>                                                                                                                                                                                                                                                                                   |
| 3.2 OS data immature or not published by the end of observation                                                                                                         | e.g., In NOVA (NCT01847274), pivotal trial of niraparib (maintenance therapy in platinum-sensitive, recurrent ovarian cancer), at the time of the database lock in latest publication, the results for the time until overall survival were not mature. <sup>8</sup>                                                                                                                                                                                                                                                                          |
| <b>4. OS benefit not evaluable</b>                                                                                                                                      |                                                                                                                                                                                                                                                                                                                                                                                                                                                                                                                                               |

| <b>Type</b>                                                                          | <b>Example</b>                                                                                                                                                  |
|--------------------------------------------------------------------------------------|-----------------------------------------------------------------------------------------------------------------------------------------------------------------|
| 4.1 Indication supported by single arm trial only, that is, OS benefit not evaluable | e.g., Camrelizumab in relapsed or refractory classical Hodgkin lymphoma was approved on SHR-1210-II-204 (NCT03155425), a single-arm phase 2 study. <sup>9</sup> |

## **eBox 2. Key Words and Research Strategy to Identify Peer-Reviewed Publications of Correlations Between Surrogate End Points and Overall Survival**

### **Key words**

#1 Cancer site in specific setting

#2 Correlation OR Association OR Validation OR Relationship

#3 Surrogate endpoint in specific cancer site and cancer setting

#4 Overall survival

#5 Trial OR Studies

### **Research strategies in PubMed**

(#1 [Title/Abstract]) AND (#2 [Title/Abstract]) AND (#3 [Title/Abstract]) & (#4 [Title/Abstract]) AND (#5 [Title/Abstract])

**e.g.**, (advanced melanoma[title/abstract]) and ((correlation[title/abstract]) or (association[title/abstract]) or (validation[title/abstract]) or

(relationship[title/abstract])) and ((progression-free survival[title/abstract]) or (response rate[title/abstract])) and (overall survival [title/abstract]) and

((trial[title/abstract]) or (studies[title/abstract]))

*Note: the search terms were similar with a previous study*

## Results

**eTable 4. Sources of Information**

| Information source                                             | No. Indication (%) |
|----------------------------------------------------------------|--------------------|
| <b>Data sources for pivotal trials</b>                         | <b>141 (100)</b>   |
| Regulatory review document <sup>a</sup>                        | 87 (61.7)          |
| Label <sup>b</sup>                                             | 54 (38.3)          |
| <b>Data sources for approval time <sup>c</sup></b>             |                    |
| Regulatory review document                                     | 87 (61.7)          |
| Label                                                          | 19 (13.5)          |
| Manufacture website                                            | 34 (24.1)          |
| <b>Data sources for overall survival data</b>                  |                    |
| Regulatory review document                                     | 87 (61.7)          |
| Label                                                          | 6 (4.3)            |
| Peer-reviewed publication as supplementary source <sup>a</sup> | 128 (90.8)         |

**Note:**

<sup>a</sup> By June 30, 2021

<sup>b</sup> By December 31, 2020

<sup>c</sup> All the data were crosschecked using a commercial dataset (<http://db.pharmcube.com/database/drugde/main>).

**eFigure 2. Approval Year of Indications Supported Only by Single-Arm or Dose-Optimization Trials**

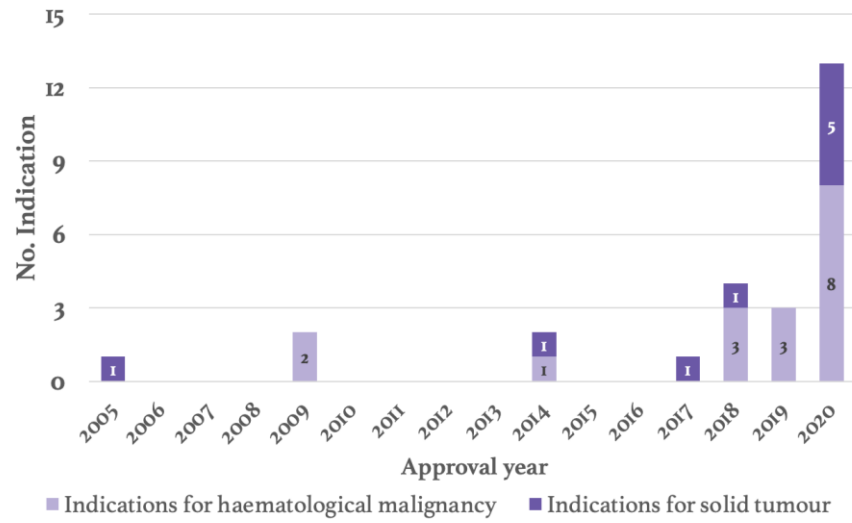

**eFigure 3. Classification of Overall Survival (OS) Benefit for Cancer Indications Approved in China, by Approval Year**

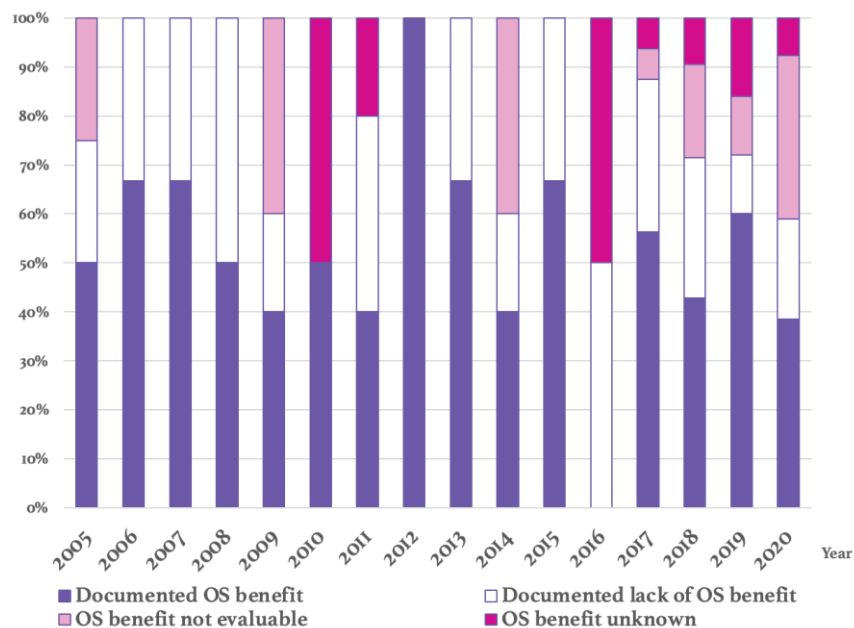

**eTable 5. Line of Therapy of Cancer Indications of Drugs Approved in China Only and Drugs Also Approved in the United States or the European Union**

| Line of therapy              | Indications, n (%) | Indications, n (%)                                  |                                                                |
|------------------------------|--------------------|-----------------------------------------------------|----------------------------------------------------------------|
|                              |                    | Of cancer drugs approved in China only <sup>a</sup> | Of cancer drugs also approved in the US or Europe <sup>a</sup> |
| <b>Total</b>                 | <b>141 (100)</b>   | <b>30 (100)</b>                                     | <b>111 (100)</b>                                               |
| First-line therapy           | 67 (47.5)          | 8 (26.7)                                            | 59 (53.2)                                                      |
| Later therapy                | 67 (47.5)          | 22 (73.3)                                           | 45 (40.5)                                                      |
| Adjuvant/neoadjuvant therapy | 7 (5.0)            | 0                                                   | 7 (6.3)                                                        |

<sup>a</sup> By June 30, 2021; drug indications for more than one line of therapy were classified by the earliest line (neoadjuvant/adjuvant before first before later line).



**eTable 6. Classification of Overall Survival and ESMO-MCBC Score of Cancer Drugs**

| Overall survival benefit type | Indication, n (%) | Applicable to ESMO-MCBS                                      |                                                                                             |
|-------------------------------|-------------------|--------------------------------------------------------------|---------------------------------------------------------------------------------------------|
|                               |                   | Indications with ESMO-MCBS score, n (%), of all indications) | Indications with clinically meaningful benefit, n (%), of indications with ESMO-MCBS score) |
| <b>Total</b>                  | <b>141 (100)</b>  | <b>66 (46.8)</b>                                             | <b>38 (57.6)</b>                                                                            |
| Documented OS benefit         | 68 (48.2)         | 42 (61.8)                                                    | 29 (69.0)                                                                                   |
| Documented lack of OS benefit | 34 (24.1)         | 18 (52.9)                                                    | 8 (44.4)                                                                                    |
| OS benefit unknown            | 13 (9.2)          | 5 (38.5)                                                     | 1 (20.0)                                                                                    |
| OS benefit not evaluable      | 26 (18.4)         | 1 (3.8)                                                      | 0                                                                                           |

*Note: European Society for Medical Oncology-Magnitude of Clinical Benefit Scale (ESMO-MCBS) scores were obtained from ESMO website in June 30, 2021 (<https://www.esmo.org/guidelines/esmo-mcbs/esmo-mcbs-scorecards>). ESMO-MCBS score A/B in the curative setting or 5/4 in the non-curative setting were considered clinically meaningful benefits. ESMO-MCBS scores are only available for solid tumor indications.*

**eTable 7. Magnitude of Documented Overall Survival (OS) Benefit for 68 Indications, by Cancer Type**

| No          | Generic Name (China-only approval) | NMPA approved indication                                                                     | Pivotal trial [reference] | Trial ID    | Intervention                          | Comparison                        | OS data (month) <sup>a</sup> | OS benefit (month) <sup>a</sup> | HR (95% CI)      | Note                     |
|-------------|------------------------------------|----------------------------------------------------------------------------------------------|---------------------------|-------------|---------------------------------------|-----------------------------------|------------------------------|---------------------------------|------------------|--------------------------|
| <b>Lung</b> |                                    |                                                                                              |                           |             |                                       |                                   |                              |                                 |                  |                          |
| 1           | Afatinib                           | 1st-line advanced or metastatic NSCLC with EGFR mutations                                    | LUX-Lung 6 <sup>2</sup>   | NCT01121393 | afatinib                              | gemcitabine + cisplatin           | 31.4 vs 18.4                 | 13.0                            | 0.64 (0.44-0.94) | del19-positive tumors    |
| 2           | Afatinib                           | 2nd-line advanced or metastatic NSCLC                                                        | LUX-Lung 8 <sup>10</sup>  | NCT01523587 | afatinib                              | erlotinib                         | 7.9 vs 6.8                   | 1.1                             | 0.81 (0.69-0.95) |                          |
| 3           | Alectinib                          | ALK mutation positive advanced or metastatic NSCLC                                           | ALEX <sup>11</sup>        | NCT02075840 | alectinib                             | crizotinib                        | NR vs 57.4                   | NA                              | 0.67 (0.46-0.98) |                          |
| 4           | Atezolizumab                       | 1st-line ES-SCLC, in combination with carboplatin and etoposide                              | IMpower133 <sup>12</sup>  | NCT02763579 | atezolizumab                          | placebo                           | 12.3 vs 10.3                 | 2.0                             | 0.70 (0.54-0.91) |                          |
| 5           | Anlotinib (China-only approval)    | 3rd-line advanced or metastatic NSCLC                                                        | ALTER 0303 <sup>13</sup>  | NCT02388919 | anlotinib                             | placebo                           | 9.5 vs 6.4                   | 3.1                             | 0.70 (0.55-0.89) |                          |
| 6           | Anlotinib (China-only approval)    | 3rd-line progressed or relapse SCLC                                                          | ALTER 1202                | NCT03059797 | anlotinib                             | placebo                           | 7.3 vs 4.9                   | 2.4                             | 0.53 (0.30-0.92) | Data obtained from label |
| 7           | Osimertinib                        | 1st-line advanced or metastatic NSCLC with EGFR mutation (exon 19 deletion or L858R allele)  | FLAURA <sup>14</sup>      | NCT02296125 | osimertinib                           | standard EGFR-TKI                 | 38.6 vs 31.8                 | 6.8                             | 0.80 (0.64-1.00) |                          |
| 8           | Bevacizumab                        | 1st-line, non-squamous NSCLC, in combination with platinum-based chemotherapy                | BEYOND <sup>15</sup>      | NCT01364012 | Bevacizumab + cisplatin + gemcitabine | Placebo + cisplatin + gemcitabine | 24.3 vs 17.7                 | 6.6                             | 0.68 (0.50-0.93) |                          |
| 9           | Dacomitinib                        | 1st-line, advanced or metastatic NSCLC with EGFR mutation (exon 19 deletion or L858R allele) | ARCHER 1050 <sup>16</sup> | NCT01774721 | dacomitinib                           | gefitinib                         | 34.1 vs 27.0                 | 7.1                             | 0.75 (0.59-0.95) |                          |

| No | Generic Name (China-only approval) | NMPA approved indication                                                                                                                    | Pivotal trial [reference]               | Trial ID    | Intervention  | Comparison                          | OS data (month) <sup>a</sup> | OS benefit (month) <sup>a</sup> | HR (95% CI)      | Note                   |
|----|------------------------------------|---------------------------------------------------------------------------------------------------------------------------------------------|-----------------------------------------|-------------|---------------|-------------------------------------|------------------------------|---------------------------------|------------------|------------------------|
| 10 | Durvalumab                         | Maintenance treatment, unresectable stage III NSCLC following platinum-based chemotherapy and radiation therapy                             | PACIFIC <sup>17</sup>                   | NCT02125461 | durvalumab    | placebo                             | NR vs 29.1                   | NA                              | 0.69 (0.55-0.86) |                        |
| 11 | Erlotinib                          | Maintenance treatment, locally advanced or metastatic NSCLC, following 4 cycles platinum-based chemotherapy                                 | SATURN <sup>18</sup>                    | NCT00556712 | erlotinib     | placebo                             | 12.0 vs 11.0                 | 1.0                             | 0.81 (0.70-0.95) |                        |
| 12 | Erlotinib                          | 2nd line, locally advanced or metastatic NSCLC                                                                                              | BR.21                                   | NCT00036647 | erlotinib     | placebo                             | 6.7 vs 4.7                   | 2.0                             | 0.70 (0.58-0.85) |                        |
| 13 | Crizotinib                         | ALK mutation positive locally advanced or metastatic NSCLC                                                                                  | PROFILE 1014 <sup>19</sup>              | NCT01154140 | crizotinib    | pemetrexed + cisplatin/carbo platin | NR vs 47.5                   | NA                              | 0.35 (0.08-0.72) | adjusted for crossover |
| 14 | Nivolumab                          | 2nd-line, EGFR and ALK mutation negative, locally advanced or metastatic NSCLC, after platinum-based chemotherapy                           | CheckMate 017 <sup>20</sup>             | NCT01642004 | nivolumab     | docetaxel                           | 9.2 vs 6.0                   | 3.2                             | 0.59 (0.44-0.79) |                        |
| 15 | Pembrolizumab                      | 1st-line, metastatic non-squamous NSCLC with EGFR and ALK mutation negative, in combination with pemetrexed and platinum-based chemotherapy | KEYNOTE-189 <sup>21</sup>               | NCT02578680 | pembrolizumab | placebo                             | 22.0 vs 10.7                 | 11.3                            | 0.56 (0.45-0.70) |                        |
| 16 | Pembrolizumab                      | 1st-line, locally advanced or metastatic NSCLC expressing                                                                                   | KEYNOTE-042 (China study) <sup>22</sup> | NCT03850444 | pembrolizumab | chemotherapy                        | 20.2 vs 13.5                 | 6.7                             | 0.67 (0.50-0.89) |                        |

| No              | Generic Name (China-only approval)                 | NMPA approved indication                                                                                                | Pivotal trial [reference] | Trial ID    | Intervention                                                    | Comparison                                   | OS data (month) <sup>a</sup> | OS benefit (month) <sup>a</sup> | HR (95% CI)      | Note                     |
|-----------------|----------------------------------------------------|-------------------------------------------------------------------------------------------------------------------------|---------------------------|-------------|-----------------------------------------------------------------|----------------------------------------------|------------------------------|---------------------------------|------------------|--------------------------|
|                 |                                                    | PD-L1 TPS $\geq$ 1, with EGFR and ALK mutation negative                                                                 |                           |             |                                                                 |                                              |                              |                                 |                  |                          |
| 17              | Pembrolizumab                                      | 1st-line, metastatic NSCLC, in combination with carboplatin and paclitaxel                                              | KEYNOTE-407 <sup>23</sup> | NCT02775435 | pembrolizumab                                                   | placebo                                      | 17.1 vs 11.6                 | 5.5                             | 0.71 (0.58-0.88) |                          |
| 18              | Pemetrexed                                         | 1st-line, locally advanced or metastatic NSCLC, in combination with cisplatin                                           | H3E-MC-JMDB <sup>24</sup> | NCT00087711 | pemetrexed+ cisplatin                                           | gemcitabine+ cisplatin                       | 11.8 vs 10.4                 | 1.4                             | 0.81 (0.70-0.94) |                          |
| 19              | Pemetrexed                                         | Maintenance treatment, locally advanced or metastatic non-squamous NSCLC, following 4 cycle platinum-based chemotherapy | H3E-MC-JMEN <sup>25</sup> | NCT00102804 | pemetrexed+ best supportive care                                | placebo+ best supportive care                | 13.4 vs 10.6                 | 2.8                             | 0.79 (0.65-0.95) |                          |
| 20              | Recombinant Human Endostatin (China-only approval) | 1st-line, stage III/IV NSCLC, in combination with vinorelbine and cisplatin                                             | A Phase 3 study           | NA          | Recombinant Human Endostatin+ vinblastine+ cisplatin            | vinblastine+ cisplatin                       | 14.9 vs 9.9                  | 5.0                             | Not mentioned    | Data obtained from label |
| <b>Prostate</b> |                                                    |                                                                                                                         |                           |             |                                                                 |                                              |                              |                                 |                  |                          |
| 21              | Abiraterone                                        | mCRPC                                                                                                                   | COU-AA-301 <sup>1</sup>   | NCT00638690 | abiraterone acetate + prednisone                                | placebo + prednisone                         | 15.8 vs 11.2                 | 4.6                             | 0.74 (0.64-0.86) |                          |
| 22              | Abiraterone                                        | Newly diagnosed mHSPC                                                                                                   | LATITUDE <sup>26</sup>    | NCT01715285 | androgen-deprivation therapy + abiraterone acetate + prednisone | androgen-deprivation therapy + dual placebos | 53.3 vs 36.5                 | 16.8                            | 0.66 (0.56-0.78) |                          |

| No                      | Generic Name (China-only approval) | NMPA approved indication                                            | Pivotal trial [reference] | Trial ID    | Intervention                              | Comparison                            | OS data (month) <sup>a</sup> | OS benefit (month) <sup>a</sup> | HR (95% CI)      | Note                                          |
|-------------------------|------------------------------------|---------------------------------------------------------------------|---------------------------|-------------|-------------------------------------------|---------------------------------------|------------------------------|---------------------------------|------------------|-----------------------------------------------|
| 23                      | Apalutamide                        | metastatic castration-sensitive prostate cancer                     | TITAN <sup>27</sup>       | NCT02489318 | apalutamide+ androgen-deprivation therapy | placebo++androgen-deprivation therapy | NR vs NR                     | NA                              | 0.67 (0.51-0.89) |                                               |
| 24                      | Enzalutamide                       | mCRPC                                                               | PREVAIL <sup>28</sup>     | NCT01212991 | enzalutamide                              | placebo                               | 36.0 vs 31.0                 | 5.0                             | 0.83 (0.75-0.93) |                                               |
| 25                      | Enzalutamide                       | Non-metastatic CRPC with a high risk of metastasis                  | PROSPER <sup>29</sup>     | NCT02003924 | enzalutamide                              | placebo                               | 67.0 vs 56.3                 | 10.7                            | 0.73 (0.61-0.89) |                                               |
| 26                      | Radium (223Ra) Dichloride          | mCRPC with symptomatic bone metastasis and no visceral metastasis   | ALSYMPCA <sup>30</sup>    | NCT00699751 | radium-223                                | placebo                               | 14.9 vs 11.3                 | 3.6                             | 0.70 (0.58-0.83) |                                               |
| <b>Colon and rectum</b> |                                    |                                                                     |                           |             |                                           |                                       |                              |                                 |                  |                                               |
| 27                      | Bevacizumab                        | mCRC, in combination with fluorouracil-based chemotherapy           | AVF2107g <sup>31</sup>    | NCT00109070 | bevacizumab + IFL                         | placebo + IFL                         | 20.3 vs 15.6                 | 4.7                             | 0.66             |                                               |
| 28                      | Fruquintinib (China-only approval) | 3rd line, mCRC                                                      | FRESCO <sup>32</sup>      | NCT02314819 | fruquintinib                              | placebo                               | 9.3 vs 6.6                   | 2.7                             | 0.65 (0.51-0.83) |                                               |
| 29                      | Trifluridine and Tipiracil         | 3rd line, mCRC                                                      | RECOURSE <sup>33</sup>    | NCT01607957 | trifluridine/tipiracil                    | placebo                               | 7.1 vs 5.3                   | 1.8                             | 0.68 (0.58-0.81) |                                               |
| 30                      | Regorafenib                        | 3rd line, mCRC                                                      | CONCUR <sup>34</sup>      | NCT01584830 | regorafenib                               | placebo                               | 8.8 vs 6.3                   | 2.5                             | 0.55 (0.40-0.77) |                                               |
| 31                      | Cetuximab                          | 1st-line, RAS wild-type mCRC, in combination with FOLFOX or FOLFIRI | TAILOR                    | NCT01228734 | cetuximab+FO LFOX-4                       | FOLFOX-4                              | 20.8 vs 16.5                 | 4.3                             | 0.76 (0.61-0.95) | Data obtained from regulatory review document |
| <b>Multiple myeloma</b> |                                    |                                                                     |                           |             |                                           |                                       |                              |                                 |                  |                                               |
| 32                      | Lenalidomide                       | untreated and unsuitable for transplantation multiple myeloma, in   | FIRST <sup>35</sup>       | NCT00689936 | continuous lenalidomide+ dexamethasone    | melphalan+ prednisone+ thalidomide    | 59.1 vs 49.1                 | 10.0                            | 0.78 (0.67-0.92) |                                               |

| No            | Generic Name (China-only approval) | NMPA approved indication                                                                                                                | Pivotal trial [reference]                      | Trial ID    | Intervention                          | Comparison                           | OS data (month) <sup>a</sup> | OS benefit (month) <sup>a</sup> | HR (95% CI)      | Note                                          |
|---------------|------------------------------------|-----------------------------------------------------------------------------------------------------------------------------------------|------------------------------------------------|-------------|---------------------------------------|--------------------------------------|------------------------------|---------------------------------|------------------|-----------------------------------------------|
|               |                                    | combination with dexamethasone                                                                                                          |                                                |             |                                       |                                      |                              |                                 |                  |                                               |
| 33            | Lenalidomide                       | 2nd-line, multiple myeloma, in combination with dexamethasone                                                                           | MM-009 <sup>36</sup>                           | NCT00056160 | lenalidomide                          | placebo                              | 29.6 vs 20.2                 | 9.4                             | 0.44 (0.30-0.65) |                                               |
| 34            | Bortezomib                         | multiple myeloma relapsed after at least one treatment                                                                                  | APEX <sup>37</sup>                             | NCT00048230 | bortezomib                            | dexamethasone                        | 29.8 vs 23.7                 | 6.1                             | 0.77             |                                               |
| 35            | Bortezomib                         | untreated and unsuitable for high-dose chemotherapy and myelosuppression multiple myeloma, in combination with melphalan and prednisone | VISTA <sup>38 39</sup>                         | NCT00111319 | bortezomib+ melphalan+ prednisone     | melphalan+ prednisone                | 56.4 vs 43.1                 | 13.3                            | 0.70 (0.57-0.85) |                                               |
| 36            | Ixazomib                           | 2nd-line, multiple myeloma, in combination with lenalidomide and dexamethasone                                                          | TOURMALINE-MM1 Chinese expansion <sup>40</sup> | NCT01564537 | ixazomib+ lenalidomide+ dexamethasone | placebo+ lenalidomide+ dexamethasone | 25.8 vs 15.8                 | 10.0                            | 0.42 (0.24-0.73) |                                               |
| <b>Breast</b> |                                    |                                                                                                                                         |                                                |             |                                       |                                      |                              |                                 |                  |                                               |
| 37            | Eribulin                           | 3rd-line advanced or metastatic breast cancer after anthracycline and taxane-based chemotherapy                                         | EMBRACE <sup>41</sup>                          | NCT00388726 | eribulin                              | treatment of physician's choice      | 13.1 vs 10.6                 | 2.5                             | 0.81 (0.66-0.99) |                                               |
| 38            | Pyrotinib (China-only approval)    | 2nd line relapsed or metastatic HER2 positive breast cancer after anthracycline and taxane-based chemotherapy, in                       | HR-BLTN-I/II-MBC                               | NCT02422199 | pyrotinib + capecitabine              | lapatinib + capecitabine             | NR vs 16.2                   | NA                              | 0.36 (0.16-0.82) | Data obtained from regulatory review document |

| No                   | Generic Name (China-only approval)        | NMPA approved indication                                                                                                                              | Pivotal trial [reference]     | Trial ID    | Intervention                                    | Comparison                              | OS data (month) <sup>a</sup> | OS benefit (month) <sup>a</sup> | HR (95% CI)         | Note                          |
|----------------------|-------------------------------------------|-------------------------------------------------------------------------------------------------------------------------------------------------------|-------------------------------|-------------|-------------------------------------------------|-----------------------------------------|------------------------------|---------------------------------|---------------------|-------------------------------|
|                      |                                           | combination with capecitabine                                                                                                                         |                               |             |                                                 |                                         |                              |                                 |                     |                               |
| 39                   | Pertuzumab                                | metastatic or unresectable locally relapsed HER2-positive breast cancer, in combination with trastuzumab and docetaxel                                | CLEOPATRA <sup>42</sup>       | NCT00567190 | pertuzumab +trastuzumab + docetaxel             | placebo+ trastuzumab+ docetaxel         | 57.1 vs 40.8                 | 16.3                            | 0.69 (0.58-0.82)    |                               |
| 40                   | Abemaciclib                               | HR positive, HER2-negative advanced or metastatic breast cancer with disease progression following endocrine therapy, in combination with fulvestrant | MONARCH 2                     | NCT02107703 | abemaciclib + fulvestrant                       | placebo + fulvestrant                   | 46.7 vs 37.3                 | 9.4                             | 0.757 (0.606-0.945) |                               |
| <b>Stomach</b>       |                                           |                                                                                                                                                       |                               |             |                                                 |                                         |                              |                                 |                     |                               |
| 41                   | Apatinib (China-only approval)            | 3rd-line gastric cancer                                                                                                                               | A Phase 2 study <sup>43</sup> | NCT00970138 | apatinib 850 mg once daily or 425mg twice daily | placebo                                 | 4.8 vs 4.3 vs 2.5            | 2.3 (850mg); 1.8 (425mg)        | 0.51 (0.32-0.83)    | 850mg group                   |
| 42                   | Nivolumab                                 | 3rd line, advanced or relapsed gastric or gastroesophageal junction cancer                                                                            | ONO-4538-12 <sup>44</sup>     | NCT02267343 | nivolumab                                       | placebo                                 | 5.3 vs 4.1                   | 1.2                             | 0.63 (0.51-0.78)    |                               |
| 43                   | Tegafur, Gimeracil and Oteracil Potassium | unresectable locally advanced or metastatic gastric cancer                                                                                            | SC-101                        | NCT00202969 | S-1+cisplatin                                   | fluorouracil+ cisplatin                 | 14.4 vs 10.3                 | 4.1                             | Not mentioned       | Data obtained from label      |
| <b>Head and neck</b> |                                           |                                                                                                                                                       |                               |             |                                                 |                                         |                              |                                 |                     |                               |
| 44                   | Nivolumab                                 | 2nd-line, relapsed or refractory HNSCC expressing PD-L1 TPS $\geq$ 1, with disease                                                                    | CheckMate 141                 | NCT02105636 | nivolumab                                       | standard, single-agent systemic therapy | 12.5 vs 5.9                  | 6.6                             | 0.38 (0.19-0.77)    | Asian subgroup, data obtained |

| No              | Generic Name (China-only approval) | NMPA approved indication                                                                                | Pivotal trial [reference]           | Trial ID    | Intervention                                   | Comparison                              | OS data (month) <sup>a</sup> | OS benefit (month) <sup>a</sup> | HR (95% CI)      | Note                            |
|-----------------|------------------------------------|---------------------------------------------------------------------------------------------------------|-------------------------------------|-------------|------------------------------------------------|-----------------------------------------|------------------------------|---------------------------------|------------------|---------------------------------|
|                 |                                    | progression after or during platinum-containing regimens                                                |                                     |             |                                                | (methotrexate, docetaxel, or cetuximab) |                              |                                 |                  | from regulatory review document |
| 45              | Pembrolizumab                      | 1st-line, metastatic or unresectable relapsed HNSCC expressing PD-L1 CPS $\geq$ 1                       | KEYNOTE-048 <sup>45</sup>           | NCT02358031 | pembrolizumab + platinum+ 5-fluorouracil       | cetuximab+ platinum+ 5-fluorouracil     | 14.7 vs 11.0                 | 3.7                             | 0.60 (0.45-0.82) |                                 |
| 46              | Cetuximab                          | 1st-line, recurrent and/or metastatic HNSCC, in combination with platinum and fluorouracil chemotherapy | EXTREME <sup>46</sup>               | NCT00122460 | cetuximab+ cisplatin/carboplatin+ fluorouracil | cisplatin/carboplatin+ fluorouracil     | 10.1 vs 7.4                  | 2.7                             | 0.80 (0.64-0.99) |                                 |
| <b>Leukemia</b> |                                    |                                                                                                         |                                     |             |                                                |                                         |                              |                                 |                  |                                 |
| 47              | Azacitidine                        | CMML                                                                                                    | AZA PH GL 2003 CL 001 <sup>47</sup> | NCT00071799 | azacitidine                                    | conventional care                       | 24.5 vs 15.0                 | 9.5                             | 0.58 (0.43-0.77) |                                 |
| 48              | Ibrutinib                          | chronic lymphocytic leukemia/small lymphocytic lymphoma                                                 | RESONATE <sup>48</sup>              | NCT01578707 | ibrutinib                                      | ofatumumab                              | 67.7 vs 65.1                 | 2.6                             | 0.24 (0.11-0.55) |                                 |
| 49              | Blinatumomab                       | relapsed or refractory precursor B-cell acute lymphoblastic leukemia                                    | TOWER <sup>49</sup>                 | NCT02013167 | blinatumomab                                   | standard-of-care chemotherapy           | 7.7 vs 4.0                   | 3.7                             | 0.71 (0.55-0.93) |                                 |
| <b>Melanoma</b> |                                    |                                                                                                         |                                     |             |                                                |                                         |                              |                                 |                  |                                 |
| 50              | Dabrafenib                         | unresectable or metastatic melanoma with BRAF V600E or V600K mutations, in combination with trametinib  | COMBI-d <sup>50</sup>               | NCT01584648 | dabrafenib + trametinib                        | dabrafenib + placebo                    | 25.1 vs 18.7                 | 6.4                             | 0.71 (0.55-0.92) |                                 |



| No               | Generic Name (China-only approval) | NMPA approved indication                                                                               | Pivotal trial [reference]           | Trial ID    | Intervention             | Comparison                            | OS data (month) <sup>a</sup> | OS benefit (month) <sup>a</sup> | HR (95% CI)      | Note               |
|------------------|------------------------------------|--------------------------------------------------------------------------------------------------------|-------------------------------------|-------------|--------------------------|---------------------------------------|------------------------------|---------------------------------|------------------|--------------------|
| 51               | Trametinib                         | unresectable or metastatic melanoma with BRAF V600E or V600K mutations, in combination with dabrafenib | COMBI-d <sup>50</sup>               | NCT01584648 | dabrafenib+trametinib    | dabrafenib+placebo                    | 25.1 vs 18.7                 | 6.4                             | 0.71 (0.55-0.92) |                    |
| 52               | Vemurafenib                        | unresectable or metastatic melanoma with BRAF V600 mutations                                           | BRIM-3 <sup>51</sup>                | NCT01006980 | vemurafenib              | dacarbazine                           | 13.6 vs 10.3                 | 3.3                             | 0.81 (0.68-0.96) |                    |
| <b>Liver</b>     |                                    |                                                                                                        |                                     |             |                          |                                       |                              |                                 |                  |                    |
| 53               | Apatinib (China-only approval)     | advanced HCC failed or intolerated to at least first-line systemic treatment                           | AHELP <sup>52</sup>                 | NCT02329860 | apatinib                 | placebo                               | 8.7 vs 6.8                   | 1.9                             | 0.79 (0.62-1.00) |                    |
| 54               | Atezolizumab                       | unresectable HCC without previous systemic treatment, in combination with bevacizumab                  | IMbrave150 <sup>53</sup>            | NCT03434379 | atezolizumab+bevacizumab | sorafenib                             | NR vs 13.2                   | NA                              | 0.58 (0.42-0.79) |                    |
| 55               | Regorafenib                        | HCC who has been previously treated with sorafenib                                                     | RESORCE <sup>34</sup>               | NCT01774344 | regorafenib              | placebo                               | 10.6 vs 7.8                  | 2.8                             | 0.63 (0.50-0.79) |                    |
| 56               | Sorafenib                          | unresectable or metastatic HCC                                                                         | SHARP <sup>54</sup>                 | NCT00105443 | sorafenib                | placebo                               | 10.7 vs 7.9                  | 2.8                             | 0.69 (0.55-0.87) |                    |
| <b>Esophagus</b> |                                    |                                                                                                        |                                     |             |                          |                                       |                              |                                 |                  |                    |
| 57               | Camrelizumab (China-only approval) | 2nd-line, locally advanced or metastatic esophageal squamous cell carcinoma                            | ESCOR <sup>55</sup>                 | NCT03099382 | camrelizumab             | investigator's choice of chemotherapy | 8.3 vs 6.2                   | 2.1                             | 0.71 (0.57-0.87) |                    |
| 58               | Pembrolizumab                      | 2nd-line, locally advanced or metastatic esophageal squamous                                           | KEYNOTE-181 (China expansion study) | NCT03933449 | pembrolizumab            | investigator's choice of paclitaxel,  | 12.0 vs 5.3                  | 6.7                             | 0.34 (0.17-0.69) | Data obtained from |

| No              | Generic Name (China-only approval) | NMPA approved indication                                                                                                                                                 | Pivotal trial [reference]         | Trial ID    | Intervention                                                              | Comparison                                                                 | OS data (month) <sup>a</sup>    | OS benefit (month) <sup>a</sup> | HR (95% CI)      | Note                                                              |
|-----------------|------------------------------------|--------------------------------------------------------------------------------------------------------------------------------------------------------------------------|-----------------------------------|-------------|---------------------------------------------------------------------------|----------------------------------------------------------------------------|---------------------------------|---------------------------------|------------------|-------------------------------------------------------------------|
|                 |                                    | cell carcinoma expressing PD-L1 CPS $\geq 1$                                                                                                                             |                                   |             |                                                                           | docetaxel, or irinotecan                                                   |                                 |                                 |                  | Review Document                                                   |
| <b>Ovary</b>    |                                    |                                                                                                                                                                          |                                   |             |                                                                           |                                                                            |                                 |                                 |                  |                                                                   |
| 59              | Olaparib                           | Maintenance treatment, recurrent epithelial ovarian, fallopian tube or primary peritoneal cancer, who are in complete or partial response to platinum-based chemotherapy | SOLO2 (D0816C00002) <sup>56</sup> | NCT01874353 | olaparib                                                                  | placebo                                                                    | 51.7 vs 35.4                    | 16.3                            | 0.56 (0.35-0.97) | adjust for subsequent PARP inhibitor therapy in the placebo group |
| 60              | Niraparib                          | Maintenance treatment, advanced epithelial ovarian cancer, fallopian tube cancer or primary peritoneal cancer, after platinum-based chemotherapy                         | PRIMA <sup>57</sup>               | NCT02655016 | niraparib                                                                 | placebo                                                                    | 81% vs 59%                      | 22%                             | 0.51 (0.27-0.97) | 24-month OS rate                                                  |
| <b>Lymphoma</b> |                                    |                                                                                                                                                                          |                                   |             |                                                                           |                                                                            |                                 |                                 |                  |                                                                   |
| 61              | Bortezomib                         | untreated and unsuitable for hematopoietic stem cell transplantation MCL, in combination with rituximab, cyclophosphamide, doxorubicin, and prednisone                   | LYM-3002 <sup>58</sup>            | NCT00722137 | VR-CAP (rituximab+ cyclophosphamide+ doxorubicin+ bortezomib+ prednisone) | R-CHOP (rituximab+ cyclophosphamide+ doxorubicin+ vincristine+ prednisone) | 90.7 vs 55.7                    | 35.0                            | 0.66 (0.51-0.85) |                                                                   |
| 62              | Lenalidomide                       | previously treated follicular lymphoma, in combination with a rituximab product                                                                                          | AUGMENT                           | NCT01938001 | lenalidomide+ rituximab                                                   | placebo+ rituximab                                                         | Estimated 2-year OS% 95% vs 86% | 9%                              | 0.45 (0.22-0.92) | Data obtained from regulatory review document                     |

| No                  | Generic Name (China-only approval) | NMPA approved indication                                                                                             | Pivotal trial [reference] | Trial ID    | Intervention                    | Comparison                    | OS data (month) <sup>a</sup> | OS benefit (month) <sup>a</sup> | HR (95% CI)      | Note                                                        |
|---------------------|------------------------------------|----------------------------------------------------------------------------------------------------------------------|---------------------------|-------------|---------------------------------|-------------------------------|------------------------------|---------------------------------|------------------|-------------------------------------------------------------|
| <b>Brain</b>        |                                    |                                                                                                                      |                           |             |                                 |                               |                              |                                 |                  |                                                             |
| 63                  | Temozolomide                       | 1st-line, newly diagnosed glioblastoma multiforme, in combination with radiotherapy, and then as maintenance therapy | EORTC-NCIC <sup>59</sup>  | NCT00006353 | temozolomide+ radiotherapy      | radiotherapy                  | 14.6 vs 12.1                 | 2.5                             | 0.63 (0.52-0.75) |                                                             |
| <b>Kidney</b>       |                                    |                                                                                                                      |                           |             |                                 |                               |                              |                                 |                  |                                                             |
| 64                  | Pazopanib                          | 1st-line or 2nd-line advanced RCC                                                                                    | VEG105192 <sup>3</sup>    | NCT00334282 | pazopanib                       | placebo                       | 22.9 vs 20.5                 | 2.4                             | 0.50 (0.32-0.76) | adjusted for crossover                                      |
| <b>Mesothelioma</b> |                                    |                                                                                                                      |                           |             |                                 |                               |                              |                                 |                  |                                                             |
| 65                  | Pemetrexed                         | unresectable malignant pleural mesothelioma, in combination of cisplatin                                             | JMCH <sup>60</sup>        | NCT00005636 | pemetrexed disodium+ cisplatin  | cisplatin                     | 12.1 vs 9.3                  | 2.8                             | 0.77 (0.61-0.96) |                                                             |
| <b>Nasopharynx</b>  |                                    |                                                                                                                      |                           |             |                                 |                               |                              |                                 |                  |                                                             |
| 66                  | Nimotuzumab (China-only approval)  | stage III/IV nasopharyngeal cancer with EGFR mutation, in combination with radiotherapy                              | A Phase 2 study           | NA          | nimotuzumab+ radiation          | radiation                     | 36-month OS % 84.3% vs 77.6% | 6.7%                            | NA               | Data obtained from label; mean survival month: 35.8 vs 32.2 |
| <b>Other</b>        |                                    |                                                                                                                      |                           |             |                                 |                               |                              |                                 |                  |                                                             |
| 67                  | Sunitinib                          | progressive, well-differentiated pNET, with unresectable locally advanced or metastatic disease                      | A6181111 <sup>61 62</sup> | NCT00428597 | sunitinib+ best supportive care | placebo+ best supportive care | 38.6 vs 16.3                 | 22.3                            | 0.40 (0.23-0.71) | Censoring at crossover                                      |
| 68                  | Sunitinib                          | GIST, after disease progression on or intolerance to imatinib mesylate                                               | A6181004 <sup>63</sup>    | NCT00075218 | sunitinib                       | placebo                       | NR vs NR                     | NA                              | 0.49 (0.29-0.83) |                                                             |

**Abbreviation:** HR, hazard ratio; NR, not reached; NA, not applicable; mCRPC, metastatic castration-resistant prostate cancer; mHSPC, high-risk metastatic endocrine therapy-sensitive prostate cancer; NSCLC, non-small cell lung cancer; EGFR, epidermal growth factor receptor; ALK, anaplastic lymphoma kinase; SCLC, small cell lung cancer; ES-SCLC, extensive-stage small cell lung cancer; mCRC, metastatic colorectal cancer; IFL, irinotecan, bolus fluorouracil, and leucovorin; PD-1, programmed cell death receptor-1; HNSCC, head and neck squamous cell cancer; TPS, tumor proportion score; CPS, combined positive score; RCC, renal cell carcinoma; MCL, mantle cell lymphoma; HCC, hepatocellular carcinoma; GIST, gastrointestinal stromal tumor; pNET, pancreatic neuroendocrine tumors; FOLFOX, leucovorin, fluorouracil, and oxaliplatin; FOLFIRI, leucovorin, fluorouracil, and irinotecan; HR, hormone receptor; HER2, human epidermal growth factor receptor 2.

**Note:** for indications with more than one pivotal trial showing overall survival benefit, the maximum survival gain was extracted for analysis.

<sup>a</sup> OS benefit measured in months unless otherwise indicated.

**eTable 8. Results of Pivotal Trials Supporting 34 Indications With Documented Lack of Statistically Significant Overall Survival (OS) Benefit**

| No          | Generic Name (China-only approval) | NMPA approved indication                                                                                                                                     | Pivotal trial [reference] | Trial ID    | Intervention                          | Comparison                           | Primary Endpoint | Primary Endpoint Results (month, HR [95% CI]) | OS data (month) <sup>a</sup> | OS HR (95% CI)   | Note |
|-------------|------------------------------------|--------------------------------------------------------------------------------------------------------------------------------------------------------------|---------------------------|-------------|---------------------------------------|--------------------------------------|------------------|-----------------------------------------------|------------------------------|------------------|------|
| <b>Lung</b> |                                    |                                                                                                                                                              |                           |             |                                       |                                      |                  |                                               |                              |                  |      |
| 1           | Camrelizumab (China-only approval) | 1st-line, unresectable locally advanced or metastatic non-squamous NSCLC with EGFR and ALK mutation negative, in combination with pemetrexed and carboplatin | CameL <sup>64</sup>       | NCT03134872 | camrelizumab+ carboplatin+ pemetrexed | carboplatin+ pemetrexed              | PFS              | 11.3 vs 8.3<br>HR=0.60<br>(0.45-0.79)         | NR vs 20.9                   | 0.73 (0.53-1.02) |      |
| 2           | Ceritinib                          | 1st-line, locally advanced or metastatic NSCLC with ALK mutation positive                                                                                    | ASCEND-4 <sup>65</sup>    | NCT01828099 | ceritinib                             | chemotherapy                         | PFS              | 16.6 vs 8.1<br>HR=0.55<br>(0.42-0.73)         | NR vs 26.2                   | 0.73 (0.50-1.08) |      |
| 3           | Ceritinib                          | 2nd-line, locally advanced or metastatic NSCLC with ALK mutation positive                                                                                    | ASCEND-5 <sup>66</sup>    | NCT01828112 | ceritinib                             | chemotherapy (pemetrexed/d ocetaxel) | PFS              | 5.4 vs 1.6<br>HR=0.49<br>(0.36-0.67)          | 18.1 vs 20.1                 | 1.0 (0.67-1.49)  |      |
| 4           | Erlotinib                          | 1st-line, maintenance or 2nd line, locally advanced or metastatic NSCLC with                                                                                 | ENSURE <sup>67</sup>      | NCT01342965 | erlotinib                             | gemcitabine+ cisplatin               | PFS              | 11.0 vs 5.5<br>HR=0.34<br>(0.22-0.51)         | 26.3 vs 25.5                 | 0.91 (0.63-1.31) |      |

| No            | Generic Name (China-only approval) | NMPA approved indication                                                                        | Pivotal trial [reference]  | Trial ID    | Intervention                                   | Comparison                                 | Primary Endpoint | Primary Endpoint Results (month, HR [95%CI]) | OS data (month) <sup>a</sup> | OS HR (95% CI)   | Note                     |
|---------------|------------------------------------|-------------------------------------------------------------------------------------------------|----------------------------|-------------|------------------------------------------------|--------------------------------------------|------------------|----------------------------------------------|------------------------------|------------------|--------------------------|
|               |                                    | EGFR mutation positive                                                                          |                            |             |                                                |                                            |                  |                                              |                              |                  |                          |
|               |                                    |                                                                                                 | EURTAC <sup>68</sup>       | NCT00446225 | erlotinib                                      | standard chemotherapy                      | PFS              | 9.7 vs 5.2<br>HR=0.37<br>(0.25-0.54)         | 19.3 vs 19.5                 | 1.04 (0.65-1.68) |                          |
|               |                                    |                                                                                                 | OPTIMAL <sup>69 70</sup>   | NCT00874419 | erlotinib                                      | gemcitabine+ carboplatin                   | PFS              | 13.1 vs 4.6<br>HR=0.16<br>(0.10-0.26)        | 22.8 vs 27.2                 | 1.19 (0.83-1.71) |                          |
| 5             | Icotinib (China-only approval)     | 1st-line, locally advanced or metastatic NSCLC with EGFR mutation                               | ICOGEN <sup>4</sup>        | NCT01040780 | icotinib                                       | gefitinib                                  | PFS              | 4.6 vs 3.4<br>HR=0.84<br>(0.67-1.05)         | 13.3 vs 13.9                 | 1.02 (0.82-1.27) |                          |
| 6             | Osimertinib                        | 2nd-line, locally advanced or metastatic NSCLC with EGFR T790M mutation positive                | AURA3 <sup>71 72</sup>     | NCT02151981 | osimertinib                                    | platinum+ pemetrexed                       | PFS              | 10.1 vs 4.4<br>HR=0.30<br>(0.23-0.41)        | 26.8 vs 22.5                 | 0.87 (0.67-1.12) |                          |
| 7             | Pemetrexed                         | 2nd-line, locally advanced or metastatic non-squamous NSCLC                                     | H3E-MC-JMID <sup>73</sup>  | NCT00391274 | pemetrexed                                     | docetaxel                                  | OS               | 11.7 vs 12.2<br>HR=1.14<br>(0.78-1.68)       | 11.7 vs 12.2                 | 1.14 (0.78-1.68) |                          |
|               |                                    |                                                                                                 | JMEI <sup>74</sup>         | NCT00004881 | pemetrexed                                     | docetaxel                                  | OS               | 8.3 vs 7.9<br>HR=0.99<br>(0.82-1.20)         | 8.3 vs 7.9                   | 0.99 (0.82-1.20) |                          |
| <b>Breast</b> |                                    |                                                                                                 |                            |             |                                                |                                            |                  |                                              |                              |                  |                          |
| 8             | Abemaciclib                        | initial endocrine-based therapy, locally advanced or metastatic breast cancer with HR positive, | MONARCH 3 <sup>75 76</sup> | NCT02246621 | abemaciclib+ non-steroidal aromatase inhibitor | placebo+ non-steroidal aromatase inhibitor | PFS              | 28.2 vs 14.8<br>HR=0.54<br>(0.42-0.70)       | NR vs NR                     | 1.06 (0.68-1.63) | Data obtained from label |

| No            | Generic Name (China-only approval) | NMPA approved indication                                                                                                        | Pivotal trial [reference]           | Trial ID    | Intervention                                            | Comparison                                            | Primary Endpoint | Primary Endpoint Results (month, HR [95%CI]) | OS data (month) <sup>a</sup> | OS HR (95% CI)   | Note |
|---------------|------------------------------------|---------------------------------------------------------------------------------------------------------------------------------|-------------------------------------|-------------|---------------------------------------------------------|-------------------------------------------------------|------------------|----------------------------------------------|------------------------------|------------------|------|
|               |                                    | HER2 negative, in combination with an aromatase inhibitor                                                                       |                                     |             |                                                         |                                                       |                  |                                              |                              |                  |      |
|               |                                    |                                                                                                                                 | MONARCH plus Cohort A <sup>77</sup> | NCT02763566 | abemaciclib+ non-steroidal aromatase inhibitor          | placebo+ non-steroidal aromatase inhibitor            | PFS              | NR vs 14.7<br>HR=0.50<br>(0.35-0.72)         | NR vs NR                     | Not reported     |      |
| 9             | Lapatinib                          | 2nd-line, HER2 positive advanced or metastatic breast cancer, in combination with capecitabine                                  | EGF100151 <sup>78 79</sup>          | NCT00078572 | lapatinib+ capecitabine                                 | capecitabine                                          | TTP              | 6.2 vs 4.3<br>HR=0.57<br>(0.43-0.77)         | 18.8 vs 16.2                 | 0.87 (0.71-1.08) |      |
| 10            | Pertuzumab                         | adjuvant therapy HER2-positive early breast cancer at high risk of recurrence, in combination with trastuzumab and chemotherapy | APHINITY <sup>80 81</sup>           | NCT01358877 | pertuzumab+ standard adjuvant chemotherapy+ trastuzumab | placebo+ standard adjuvant chemotherapy + trastuzumab | 3-year IDFS      | 92.3% vs 90.6%<br>HR=0.81<br>(0.66-1.00)     | 6-year OS% 95% vs 94%        | 0.81 (0.66-1.00) |      |
| 11            | Trastuzumab Emtansine              | adjuvant therapy, residual invasive HER2-positive early breast cancer, after taxanes plus trastuzumab based neoadjuvant therapy | KATHERINE <sup>82</sup>             | NCT01772472 | trastuzumab emtansine                                   | trastuzumab                                           | DFS              | 88.3% vs 77.0%<br>HR=0.50<br>(0.39-0.64)     | NR vs NR                     | 0.70 (0.47-1.05) |      |
| <b>Kidney</b> |                                    |                                                                                                                                 |                                     |             |                                                         |                                                       |                  |                                              |                              |                  |      |
| 12            | Axitinib                           | advanced RCC after failure of                                                                                                   | A4061051 <sup>83 84</sup>           | NCT00920816 | axitinib                                                | sorafenib                                             | PFS              | 6.5 vs 4.8<br>HR=0.73                        | 21.7 vs 23.3                 | 1.00 (0.73-1.36) |      |

| No              | Generic Name (China-only approval) | NMPA approved indication                                                            | Pivotal trial [reference] | Trial ID    | Intervention           | Comparison      | Primary Endpoint | Primary Endpoint Results (month, HR [95% CI]) | OS data (month) <sup>a</sup> | OS HR (95% CI)   | Note                                              |
|-----------------|------------------------------------|-------------------------------------------------------------------------------------|---------------------------|-------------|------------------------|-----------------|------------------|-----------------------------------------------|------------------------------|------------------|---------------------------------------------------|
|                 |                                    | tyrosine kinase inhibitor or cytokine therapy                                       |                           |             |                        |                 |                  | (0.51-1.06)                                   |                              |                  |                                                   |
|                 |                                    |                                                                                     | AXIS <sup>85 86</sup>     | NCT00678392 | axitinib               | sorafenib       | PFS              | 8.3 vs 5.7<br>HR=0.66<br>(0.55-0.78)          | 20.1 vs 19.2                 | 0.97 (0.80-1.17) |                                                   |
| 13              | Sunitinib                          | unresectable advanced RCC                                                           | A6181034 <sup>87</sup>    | NCT00083889 | sunitinib              | interferon alfa | PFS              | 11.0 vs 5.0<br>HR=0.42<br>(0.32-0.54)         | 28.7 vs 23.7                 | 0.82 (0.67-1.00) | Data obtained from label                          |
| 14              | Sorafenib                          | unresectable advanced RCC                                                           | TARGET <sup>88 90</sup>   | NCT00073307 | sorafenib              | placebo         | PFS              | 5.5 vs 2.8<br>HR=0.44<br>(0.35-0.55)          | 17.8 vs 15.2                 | 0.88 (0.74-1.04) |                                                   |
| 15              | Everolimus                         | advanced RCC, after failure of sunitinib or sorafenib therapy                       | RECORD1 <sup>89 90</sup>  | NCT00410124 | everolimus             | placebo         | PFS              | 4.0 vs 1.9<br>HR=0.30<br>(0.22-0.40)          | 14.8 vs 14.4                 | 0.87 (0.65-1.15) |                                                   |
| <b>Melanoma</b> |                                    |                                                                                     |                           |             |                        |                 |                  |                                               |                              |                  |                                                   |
| 16              | Dabrafenib                         | adjuvant therapy, melanoma with BRAF V600 mutations, in combination with trametinib | COMBI-AD <sup>91</sup>    | NCT01682083 | dabrafenib+ trametinib | placebo         | RFS              | NR vs 16.6<br>HR=0.47<br>(0.39-0.58)          | NR vs NR                     | 0.57 (0.42-0.79) | Did not meet protocol-specified analysis boundary |



| No           | Generic Name (China-only approval) | NMPA approved indication                                                            | Pivotal trial [reference]    | Trial ID    | Intervention                                    | Comparison                       | Primary Endpoint | Primary Endpoint Results (month, HR [95%CI])                                 | OS data (month) <sup>a</sup> | OS HR (95% CI)                       | Note                                                                          |
|--------------|------------------------------------|-------------------------------------------------------------------------------------|------------------------------|-------------|-------------------------------------------------|----------------------------------|------------------|------------------------------------------------------------------------------|------------------------------|--------------------------------------|-------------------------------------------------------------------------------|
| 17           | Pembrolizumab                      | 2nd-line, unresectable or metastatic melanoma                                       | KEYNOTE-002 <sup>92,93</sup> | NCT01704287 | pembrolizumab 2 mg/kg<br>pembrolizumab 10 mg/kg | investigator-choice chemotherapy | PFS              | 2.9 vs 2.7<br>HR=0.58<br>(0.46-0.73)<br>2.9 vs 2.7<br>HR=0.47<br>(0.37-0.60) | 13.4 vs 11.0<br>14.7 vs 11.0 | 0.86 (0.67-1.10)<br>0.74 (0.57-0.96) | Did not meet protocol-specified boundary                                      |
| 18           | Trametinib                         | adjuvant therapy, melanoma with BRAF V600 mutations, in combination with dabrafenib | COMBI-AD <sup>91</sup>       | NCT01682083 | dabrafenib+ trametinib                          | placebo                          | RFS              | NR vs 16.6<br>HR=0.47<br>(0.39-0.58)                                         | 3-year OS%<br>86% vs 77%     | 0.57 (0.42-0.79)                     | Level of improvement did not cross the prespecified interim analysis boundary |
| <b>Brain</b> |                                    |                                                                                     |                              |             |                                                 |                                  |                  |                                                                              |                              |                                      |                                                                               |
| 19           | Bevacizumab                        | recurrent glioblastoma                                                              | AVF3708g <sup>94</sup>       | NCT00345163 | bevacizumab+ irinotecan                         | bevacizumab                      | 6-month PFS rate | 50.3% vs 42.6%<br>HR not mentioned                                           | 9.3 vs 8.8                   | not reported                         |                                                                               |
|              |                                    |                                                                                     | EORTC26101 <sup>95</sup>     | NCT01290939 | bevacizumab+ lomustine                          | lomustine                        | OS               | 9.1 vs 8.6<br>HR=0.95<br>(0.74-1.21)                                         | 9.1 vs 8.6                   | 0.95 (0.74-1.21)                     |                                                                               |

| No                      | Generic Name (China-only approval) | NMPA approved indication                                                                                      | Pivotal trial [reference]              | Trial ID | Intervention            | Comparison                          | Primary Endpoint | Primary Endpoint Results (month, HR [95%CI]) | OS data (month) <sup>a</sup>  | OS HR (95% CI)   | Note                     |
|-------------------------|------------------------------------|---------------------------------------------------------------------------------------------------------------|----------------------------------------|----------|-------------------------|-------------------------------------|------------------|----------------------------------------------|-------------------------------|------------------|--------------------------|
| 20                      | Temozolomide                       | relapse or progressed glioblastoma multiforme or anaplastic astrocytoma                                       | A Phase 2 study <sup>96</sup>          | NA       | temozolomide            | procarbazine                        | 6-month PFS rate | 3.1 vs 2.1<br>HR not mentioned               | 7.3 vs 5.7                    | p = 0.33         | Data obtained from label |
|                         |                                    |                                                                                                               | China registration study <sup>97</sup> | NA       | temozolomide            | semustine                           | 6-month PFS rate | 78.9% vs 55.9%<br>HR not mentioned           | 6-month OS%<br>96.9% vs 97.3% | not reported     |                          |
| <b>Colon and rectum</b> |                                    |                                                                                                               |                                        |          |                         |                                     |                  |                                              |                               |                  |                          |
| 21                      | Raltitrexed                        | advanced CRC who are not suitable for 5-FU/leucovorin                                                         | 1694IL/00003 <sup>98</sup>             | NA       | raltitrexed             | 5-fluorouracil                      | TTP              | 4.7 vs 3.6<br>HR=1.08<br>(0.89-1.30)         | 10.3 vs 10.3                  | 1.06 (0.85-1.32) |                          |
|                         |                                    |                                                                                                               | 1694IL/0012 <sup>99</sup>              | NA       | raltitrexed             | 5-fluorouracil+leucovorin           | ORR              | 18.6% vs 18.1%<br>HR=1.04<br>(0.65-1.63)     | 10.9 vs 12.3                  | 1.15 (0.93-1.42) |                          |
|                         |                                    |                                                                                                               | China study <sup>100</sup>             | NA       | raltitrexed+oxaliplatin | oxaliplatin+fluorouracil+leucovorin | ORR              | 29.1% vs 17.0%<br>HR not mentioned           | not reported                  | not reported     |                          |
| 22                      | Cetuximab                          | EGFR and RAS mutation wild-type mCRC failure to irinotecan-based chemotherapy, in combination with irinotecan | BOND <sup>101</sup>                    | NA       | cetuximab+irinotecan    | cetuximab                           | ORR              | 22.9% vs 10.8%<br>HR not mentioned           | 8.6 vs 6.9                    | 0.91 (0.68-1.21) |                          |
| <b>Thyroid</b>          |                                    |                                                                                                               |                                        |          |                         |                                     |                  |                                              |                               |                  |                          |

| No             | Generic Name (China-only approval) | NMPA approved indication                                                                                                                                        | Pivotal trial [reference]                  | Trial ID    | Intervention                | Comparison               | Primary Endpoint | Primary Endpoint Results (month, HR [95%CI]) | OS data (month) <sup>a</sup> | OS HR (95% CI)   | Note                                          |
|----------------|------------------------------------|-----------------------------------------------------------------------------------------------------------------------------------------------------------------|--------------------------------------------|-------------|-----------------------------|--------------------------|------------------|----------------------------------------------|------------------------------|------------------|-----------------------------------------------|
| 23             | Lenvatinib                         | locally recurrent or metastatic, progressive, radioactive iodine-refractory DTC                                                                                 | SELECT <sup>102</sup>                      | NCT01321554 | lenvatinib                  | placebo                  | PFS              | 18.3 vs 3.6<br>HR=0.21<br>(0.14-0.31)        | NR vs NR                     | 0.73 (0.50-1.07) | Data obtained from regulatory review document |
| 24             | Sorafenib                          | locally recurrent or metastatic, progressive, radioactive iodine-refractory DTC                                                                                 | DECISION <sup>103</sup>                    | NCT00984282 | sorafenib                   | placebo                  | PFS              | 10.8 vs 5.8<br>HR=0.59<br>(0.45-0.76)        | NR vs 36.5                   | 0.88 (0.63-1.24) | Data obtained from regulatory review document |
| <b>Thyroid</b> |                                    |                                                                                                                                                                 |                                            |             |                             |                          |                  |                                              |                              |                  |                                               |
| 25             | Everolimus                         | progressive, well-differentiated, non-functional neuroendocrine tumors of gastrointestinal or lung origin that are unresectable, locally advanced or metastatic | RADIANT-4 <sup>104</sup>                   | NCT01524783 | everolimus+ supportive care | placebo+ supportive care | PFS              | 11.0 vs 3.9<br>HR=0.48<br>(0.35-0.67)        | NR vs NR                     | 0.64 (0.40-1.05) |                                               |
| 26             | Everolimus                         | unresectable, locally advanced or metastatic,                                                                                                                   | RADIANT-3 <sup>105</sup><br><sub>106</sub> | NCT00510068 | everolimus                  | placebo                  | PFS              | 11.0 vs 4.6<br>HR=0.35<br>(0.27-0.45)        | 44.0 vs 37.7                 | 0.94 (0.73-1.20) |                                               |

| No              | Generic Name (China-only approval) | NMPA approved indication                                                                                                                                                                                                                                      | Pivotal trial [reference] | Trial ID    | Intervention | Comparison | Primary Endpoint | Primary Endpoint Results (month, HR [95%CI]) | OS data (month) <sup>a</sup> | OS HR (95% CI)   | Note               |
|-----------------|------------------------------------|---------------------------------------------------------------------------------------------------------------------------------------------------------------------------------------------------------------------------------------------------------------|---------------------------|-------------|--------------|------------|------------------|----------------------------------------------|------------------------------|------------------|--------------------|
|                 |                                    | well-differentiated, progressive neuroendocrine tumors of pancreatic origin                                                                                                                                                                                   |                           |             |              |            |                  |                                              |                              |                  |                    |
| <b>Prostate</b> |                                    |                                                                                                                                                                                                                                                               |                           |             |              |            |                  |                                              |                              |                  |                    |
| 27              | Apalutamide                        | nmCRPC, with a high risk of metastasis                                                                                                                                                                                                                        | SPARTAN <sup>5</sup>      | NCT01946204 | apalutamide  | placebo    | MFS              | 40.5 vs 16.2<br>HR=0.28<br>(0.23-0.350)      | NR vs 39.0                   | 0.70 (0.47-1.04) |                    |
| <b>Ovaries</b>  |                                    |                                                                                                                                                                                                                                                               |                           |             |              |            |                  |                                              |                              |                  |                    |
| 28              | Olaparib                           | maintenance treatment, advanced epithelial ovarian, fallopian tube or primary peritoneal cancer with deleterious or suspected deleterious germline or somatic BRCA-mutated, who are in complete or partial response to first-line platinum-based chemotherapy | SOLO1 <sup>107</sup>      | NCT01844986 | olaparib     | placebo    | PFS              | 49.9 vs 13.8<br>HR=0.31<br>(0.23-0.41)       | 3-year OS%<br>84% vs 80%     | 0.95 (0.60-1.53) |                    |
| <b>Liver</b>    |                                    |                                                                                                                                                                                                                                                               |                           |             |              |            |                  |                                              |                              |                  |                    |
| 29              | Lenvatinib                         | 1st-line, unresectable HCC                                                                                                                                                                                                                                    | REFLECT <sup>108</sup>    | NCT01761266 | lenvatinib   | sorafenib  | OS               | 14.7 vs 10.5<br>HR=0.82<br>(0.59-1.14)       | 14.7 vs 10.5                 | 0.82 (0.59-1.14) | Data obtained from |

| No                         | Generic Name (China-only approval) | NMPA approved indication                                                                        | Pivotal trial [reference]   | Trial ID    | Intervention        | Comparison           | Primary Endpoint | Primary Endpoint Results (month, HR [95%CI]) | OS data (month) <sup>a</sup> | OS HR (95% CI)   | Note                                          |
|----------------------------|------------------------------------|-------------------------------------------------------------------------------------------------|-----------------------------|-------------|---------------------|----------------------|------------------|----------------------------------------------|------------------------------|------------------|-----------------------------------------------|
|                            |                                    |                                                                                                 |                             |             |                     |                      |                  |                                              |                              |                  | regulatory review document                    |
| <b>Soft Tissue Sarcoma</b> |                                    |                                                                                                 |                             |             |                     |                      |                  |                                              |                              |                  |                                               |
| 30                         | Anlotinib (China-only approval)    | 2nd-line, acinar soft tissue sarcoma, clear cell sarcoma and other advanced soft tissue sarcoma | ALTER0203                   | NCT02449343 | anlotinib           | placebo              | PFS              | 6.9 vs 1.5<br>HR=0.32<br>(0.23-0.45)         | 14.3 vs 12.8                 | 0.96 (0.64-1.41) | Data obtained from regulatory review document |
| <b>Lymphoma</b>            |                                    |                                                                                                 |                             |             |                     |                      |                  |                                              |                              |                  |                                               |
| 31                         | Ibrutinib                          | 2nd-line, MCL                                                                                   | MCL-3001 <sup>109</sup>     | NCT01646021 | ibrutinib           | temsirolimus         | PFS              | 14.6 vs 6.2<br>HR=0.28<br>(0.23-0.35)        | NR vs 21.3                   | 0.76 (0.53-1.09) |                                               |
| 32                         | Ibrutinib                          | Waldenström's macroglobulinemia, in combination with rituximab                                  | PCYC-1127-CA <sup>110</sup> | NCT02165397 | ibrutinib+rituximab | placebo+rituximab    | PFS              | NR vs 20.3<br>HR=0.20<br>(0.11-0.38)         | 30-month OS%<br>94% vs 92%   | 0.62 (0.17-2.19) |                                               |
| <b>Other</b>               |                                    |                                                                                                 |                             |             |                     |                      |                  |                                              |                              |                  |                                               |
| 33                         | Decitabine                         | MDS including previously treated and untreated, de novo and secondary MDS of all French-        | D-0007 <sup>111</sup>       | NCT00043381 | decitabine          | best supportive care | ORR              | 17% vs 0<br>HR not mentioned                 | 14.0 vs 14.9                 | not reported     |                                               |

| No | Generic Name (China-only approval) | NMPA approved indication                                                                                                                                           | Pivotal trial [reference] | Trial ID    | Intervention | Comparison | Primary Endpoint | Primary Endpoint Results (month, HR [95%CI]) | OS data (month) <sup>a</sup> | OS HR (95% CI)   | Note |
|----|------------------------------------|--------------------------------------------------------------------------------------------------------------------------------------------------------------------|---------------------------|-------------|--------------|------------|------------------|----------------------------------------------|------------------------------|------------------|------|
|    |                                    | American-British subtypes                                                                                                                                          |                           |             |              |            |                  |                                              |                              |                  |      |
| 34 | Regorafenib                        | 2nd-line, locally advanced, unresectable or metastatic gastrointestinal stromal tumor who have been previously treated with imatinib mesylate and sunitinib malate | GRID <sup>112</sup>       | NCT01271712 | regorafenib  | placebo    | PFS              | 4.8 vs 0.9<br>HR=0.27<br>(0.19-0.39)         | OS%<br>78% vs 74%            | 0.77 (0.42-1.41) |      |

**Abbreviation:** PFS, progression-free survival; NSCLC, non-small cell lung cancer; EGFR, epidermal growth factor receptor; ALK, anaplastic lymphoma kinase; TTP, time-to-progression; IDFS, invasive-disease-free survival; RCC, renal cell carcinoma; RFS, relapse-free survival; NR, not reached; NA, not applicable; CRC, colorectal cancer; mCRC, metastatic colorectal cancer; ORR, objective response rate; DTC, differentiated thyroid cancer; mCRPC, metastatic castration resistant prostate cancer; MFS, metastasis-free survival; HCC, hepatocellular carcinoma; MCL, mantle-cell lymphoma; MDS, myelodysplastic syndromes

<sup>a</sup> OS benefit measured in months unless otherwise indicated.

**eTable 9. Primary End Point and Time From Enrollment to Approval of 13 Indications With Unknown Overall Survival Data by June 30, 2021**

| No. | Generic Name (China-only approval) | Indication                                                                                                                                                                | Approval Time | Pivotal Trials               | Comparator      | Primary Endpoint                                                                   | First Enrolment Time | Duration from enrolment to approval (years) |
|-----|------------------------------------|---------------------------------------------------------------------------------------------------------------------------------------------------------------------------|---------------|------------------------------|-----------------|------------------------------------------------------------------------------------|----------------------|---------------------------------------------|
| 1   | Azacitidine                        | AML                                                                                                                                                                       | Apr-2017      | CALGB8921 <sup>113</sup>     | supportive care | response rate                                                                      | Feb-1994             | 23.2                                        |
| 2   | Dasatinib                          | adults with chronic, accelerated, or myeloid or lymphoid blast phase Ph+ CML with resistance or intolerance to imatinib                                                   | Sep-2011      | START-R <sup>114</sup>       | imatinib        | MCyR%                                                                              | Feb-2005             | 6.6                                         |
| 3   | Degarelix                          | advanced prostate cancer                                                                                                                                                  | Sep-2018      | FE200486 CS21 <sup>115</sup> | leuprolide      | Cumulative probability of testosterone $\leq 0.5$ ng/mL at any monthly measurement | Feb-2006             | 12.6                                        |
| 4   | Flumatinib (China-only approval)   | Philadelphia chromosome-positive chronic phase CML                                                                                                                        | Nov-2019      | FESTnd <sup>7</sup>          | imatinib        | MMR%                                                                               | Aug-2014             | 5.2                                         |
| 5   | Fulvestrant                        | HR-positive advanced breast cancer in postmenopausal women with disease progression following endocrine therapy or relapse after or during anti-estrogen adjuvant therapy | Jun-2010      | 9238IL/0021 <sup>116</sup>   | anastrozole     | TTP                                                                                | May-1997             | 13.1                                        |
|     |                                    |                                                                                                                                                                           | Jun-2010      | D6997L00004 <sup>117</sup>   | anastrozole     | TTP                                                                                | Nov-2005             | 4.6                                         |
| 6   | Neratinib                          | after trastuzumab-based adjuvant therapy in HER2-positive breast cancer                                                                                                   | Apr-2020      | ExteNET <sup>118 119</sup>   | placebo         | DFS                                                                                | Jul-2009             | 10.8                                        |
| 7   | Niraparib                          | maintenance treatment, platinum-sensitive recurrent epithelial ovarian cancer, fallopian tube cancer or primary peritoneal cancer                                         | Dec-2019      | NOVA <sup>8</sup>            | placebo         | PFS                                                                                | Aug-2013             | 6.3                                         |
| 8   | Nilotinib                          | newly diagnosed adult Ph+CML in chronic phase                                                                                                                             | Jul-2016      | CAMN107A2405 <sup>120</sup>  | imatinib        | 12month rate of confirmed best cumulative undetectable BCR-ABL1                    | Jun-2009             | 7.1                                         |
|     |                                    |                                                                                                                                                                           | Jul-2016      | ENESTchina <sup>121</sup>    | imatinib        | MMR%                                                                               | Apr-2011             | 5.2                                         |

| No. | Generic Name<br>(China-only approval) | Indication                                                                                                                      | Approval Time | Pivotal Trials                 | Comparator                                                                 | Primary Endpoint | First Enrolment Time | Duration from enrolment to approval (years) |
|-----|---------------------------------------|---------------------------------------------------------------------------------------------------------------------------------|---------------|--------------------------------|----------------------------------------------------------------------------|------------------|----------------------|---------------------------------------------|
|     |                                       |                                                                                                                                 | Jul-2016      | ENESTnd <sup>122 123</sup>     | imatinib                                                                   | 12m MMR%         | Sep-2007             | 8.9                                         |
| 9   | Pertuzumab                            | neoadjuvant treatment, early or locally advanced ERBB2-positive breast cancer, in combination with trastuzumab and chemotherapy | Aug-2019      | NeoSphere <sup>124 125</sup>   | trastuzumab+ docetaxel<br>pertuzumab+ trastuzumab<br>pertuzumab+ docetaxel | pCR              | Dec-2007             | 11.7                                        |
|     |                                       |                                                                                                                                 | Aug-2019      | PEONY <sup>126</sup>           | placebo+ trastuzumab+ docetaxel                                            | pCR              | Mar-2016             | 3.4                                         |
| 10  | Palbociclib                           | initial treatment, HR positive, HER2 negative advanced breast cancer, in combination with letrozole                             | Jul-2018      | PALOMA-2 <sup>127</sup>        | placebo+ letrozole                                                         | PFS              | Feb-2013             | 5.5                                         |
| 11  | Chidamide<br>(China-only approval)    | advanced, hormone receptor-positive breast cancer, in combination with exemestane                                               | Nov-2019      | ACE <sup>128</sup>             | placebo                                                                    | PFS              | Jul-2015             | 4.4                                         |
| 12  | Inetetamab<br>(China-only approval)   | metastatic breast cancer who has received one or more chemotherapy regimens, in combination with vinorelbine                    | Jun-2020      | A Phase 3 study <sup>129</sup> | vinorelbine                                                                | PFS              | Jan-2009             | 11.5                                        |
| 13  | Sulfatinib<br>(China-only approval)   | advanced extrapancreatic neuroendocrine tumors                                                                                  | Dec-2020      | SANET-ep <sup>130</sup>        | placebo                                                                    | PFS              | Dec-2015             | 5.1                                         |

**Abbreviation:** HR, hazard ratio; ER, estrogen-receptor; HER2, human epidermal growth factor receptor 2; PFS, progression-free survival; pCR, pathologic complete response; CML, chronic myeloid leukemia; MMR, major molecular response; IDFS, invasive disease-free survival.



**eTable 10. Results of Single-Arm or Dose-Optimization Trials Supporting Approvals by China National Medical Products Administration, 2005-2020**

| No.                              | Generic Name<br>(China-only approval)              | Indication                                                                                                                                          | Pivotal trial<br>[reference]       | Trials ID                   | Primary endpoint | Result     | Complete Response | Partial Response | Note                                              |
|----------------------------------|----------------------------------------------------|-----------------------------------------------------------------------------------------------------------------------------------------------------|------------------------------------|-----------------------------|------------------|------------|-------------------|------------------|---------------------------------------------------|
| <b>Solid tumour</b>              |                                                    |                                                                                                                                                     |                                    |                             |                  |            |                   |                  |                                                   |
| 1                                | Icotinib<br>(China-only approval)                  | 2nd-line, locally advanced or metastatic NSCLC                                                                                                      | BD-IC-III01-V2 <sup>131</sup>      | NCT02486354                 | PFS              | 5.4 months | 0.0%              | 25.8%            | ORR was the secondary endpoint                    |
| 2                                | Denosumab                                          | unresectable giant cell tumor of bone                                                                                                               | Study 20040215 <sup>132</sup>      | NCT00396279                 | ORR              | 86.0%      | Not reported      | Not reported     |                                                   |
| 3                                | Fluazolepali<br>(China-only approval)              | advanced epithelial ovarian, fallopian tube or primary peritoneal cancer with deleterious or suspected deleterious germline or somatic BRCA-mutated | HR-FZPL-Ib-OC                      | NCT03509636                 | ORR              | 69.9%      | 4.4%              | 65.5%            | Data was obtained from label                      |
| 4                                | Crizotinib                                         | ROS1 re- arrangement positive advanced NSCLC                                                                                                        | A8081063                           | CTR20140093                 | ORR              | 69.3%      | 11.0%             | 58.3%            | Data was obtained from label                      |
| 5                                | Almonertinib<br>(China-only approval)              | 2nd-line, locally advanced or metastatic NSCLC with EGFR T790M mutation positive                                                                    | A phase 2 dose expansion study     | NA                          | ORR              | 68.9%      | Not reported      | Not reported     | Data was obtained from regulatory review document |
| 6                                | Ensartinib<br>(China-only approval)                | crizotinib-resistant locally advanced or metastatic ALK-positive NSCLC                                                                              | BTP-42322 <sup>133</sup>           | NCT03215693                 | ORR              | 52.0%      | 0.0%              | 52.0%            |                                                   |
| 7                                | Tislelizumab<br>(China-only approval)              | previously treated locally advanced or metastatic urothelial carcinoma with high PD-L1 expression                                                   | BGB-A317-204 <sup>134</sup>        | NCT04004221;<br>CTR20170071 | ORR              | 24.8%      | 9.6%              | 14.4%            |                                                   |
| 8                                | Camrelizumab<br>(China-only approval)              | previously treated advanced HCC                                                                                                                     | SHR-1210-II/III-HCC <sup>135</sup> | NCT02989922                 | ORR              | 17.6%      | 0.0%              | 14.7%            |                                                   |
| 9                                | Toripalimab<br>(China-only approval)               | previously treated advanced melanoma                                                                                                                | POLARIS-01 <sup>136</sup>          | NCT03013101                 | ORR              | 17.3%      | 0.8%              | 16.5%            |                                                   |
| 10                               | Iodine[131I]<br>Metuximab<br>(China-only approval) | unresectable or relapse HCC                                                                                                                         | A Phase 2 study                    | NA                          | ORR              | 8.2%       | 0.0%              | 8.2%             | Data was obtained from label                      |
| <b>Haematological malignancy</b> |                                                    |                                                                                                                                                     |                                    |                             |                  |            |                   |                  |                                                   |

| No. | Generic Name<br>(China-only approval)  | Indication                                                                                                                                                                     | Pivotal trial<br>[reference] | Trials ID   | Primary endpoint | Result     | Complete Response | Partial Response | Note                                              |
|-----|----------------------------------------|--------------------------------------------------------------------------------------------------------------------------------------------------------------------------------|------------------------------|-------------|------------------|------------|-------------------|------------------|---------------------------------------------------|
| 11  | Bortezomib                             | relapsed or refractory MCL                                                                                                                                                     | PINNACLE <sup>137</sup>      | NCT00063713 | TTP              | 6.2 months | 6.4%              | 25.5%            | ORR was also reported                             |
| 12  | Tislelizumab<br>(China-only approval)  | 3rd-line, relapsed or refractory classical Hodgkin lymphoma                                                                                                                    | BGB-A317-203 <sup>138</sup>  | NCT03209973 | ORR              | 87.1%      | 62.9%             | 24.3%            |                                                   |
| 13  | Brentuximab Vedotin                    | relapsed or refractory systemic anaplastic large-cell lymphoma                                                                                                                 | SG035-0004 <sup>139</sup>    | NCT00866047 | ORR              | 86.0%      | 56.9%             | 29.3%            |                                                   |
| 14  | Zanubrutinib                           | 2nd-line, adult MCL                                                                                                                                                            | BGB-3111-206 <sup>140</sup>  | NCT03206970 | ORR              | 83.7%      | 68.6%             | 15.1%            |                                                   |
| 15  | Zanubrutinib                           | 2nd-line, adult CLL/SLL                                                                                                                                                        | BGB-3111-205 <sup>141</sup>  | NCT03206918 | ORR              | 84.0%      | 3.3%              | 59.3%            |                                                   |
| 16  | Sintilimab<br>(China-only approval)    | 3rd-line, relapsed or refractory classical Hodgkin lymphoma                                                                                                                    | ORIENT-1 <sup>142</sup>      | NCT03114683 | ORR              | 80.4%      | 33.7%             | 46.7%            |                                                   |
| 17  | Orelabrutinib<br>(China-only approval) | 2nd-line, adult MCL                                                                                                                                                            | ICP-CL-00102                 | NCT03494179 | ORR              | 77.9%      | 25.6%             | 52.3%            | Data was obtained from label                      |
| 18  | Camrelizumab<br>(China-only approval)  | 3rd-line, relapsed or refractory classical Hodgkin lymphoma                                                                                                                    | SHR-1210-II-204 <sup>9</sup> | NCT03155425 | ORR              | 76.0%      | 21.0%             | 48.0%            |                                                   |
| 19  | Orelabrutinib<br>(China-only approval) | 2nd-line, adult CLL/SLL                                                                                                                                                        | ICP-CL-00103                 | NCT03493217 | ORR              | 73.8%      | 10.0%             | 63.8%            | Data was obtained from label                      |
| 20  | Bendamustine                           | 2nd-line, adult relapsed indolent non-Hodgkin lymphoma                                                                                                                         | C18083/3076                  | NCT01596621 | ORR              | 72.5%      | 18.6%             | 53.9%            | Data was obtained from regulatory review document |
| 21  | Venetoclax                             | newly diagnosed adult AML patients who are not suitable for strong induction chemotherapy due to comorbidities, or who are 75 years and older, in combination with azacitidine | M14-358 <sup>143</sup>       | NCT02203773 | ORR              | 63.2%      | 61.4%             | 1.8%             |                                                   |

| No. | Generic Name<br>(China-only approval) | Indication                                                                                          | Pivotal trial<br>[reference] | Trials ID   | Primary endpoint | Result | Complete Response | Partial Response | Note                         |
|-----|---------------------------------------|-----------------------------------------------------------------------------------------------------|------------------------------|-------------|------------------|--------|-------------------|------------------|------------------------------|
| 22  | Pralatrexate                          | relapsed or refractory PTCL                                                                         | FOT12-CN-301 <sup>144</sup>  | NCT03349333 | ORR              | 52.0%  | 19.7%             | 32.4%            |                              |
| 23  | Brentuximab Vedotin                   | relapsed or refractory classical Hodgkin lymphoma                                                   | C25007 <sup>145</sup>        | NCT01990534 | ORR              | 50.0%  | 11.7%             | 38.3%            |                              |
| 24  | Nilotinib                             | Philadelphia chromosome-positive CML in chronic phase following imatinib resistance and intolerance | CAMN107A2101 <sup>146</sup>  | NCT00109707 | 6-month MCyR     | 48.0%  | 31.0%             | 16.0%            |                              |
| 25  | Daratumumab                           | relapsed or refractory multiple myeloma                                                             | SIRIUS <sup>147</sup>        | NCT01985126 | ORR              | 29.2%  | 2.8%              | 26.4%            |                              |
| 26  | Chidamide<br>(China-only approval)    | 2nd-line, relapsed or refractory PTCL                                                               | TG0902CDM confirmatory trial | NA          | ORR              | 29.1%  | 15.2%             | 13.9%            | Data was obtained from label |

**Abbreviation:** NMPA, National Medical Products Administration; NSCLC, non-small-cell lung cancer; PFS, progression-free survival; ORR, objective response rate; HCC, hepatocellular carcinoma; MMR, major molecular response; MCL, mantle cell lymphoma; CLL, chronic lymphocytic leukemia; SLL, small lymphocytic lymphoma; PTCL, peripheral T-cell lymphoma; CML, chronic myelogenous leukemia; MCyR, major cytogenetic response; NA, not applicable.

**Note:** ORR usually defined as the proportion of patients achieving complete response (CR) or partial response (PR). In some trials, investigators included unconfirmed complete response (CRu) or unconfirmed partial response (PRu) was in the definition of ORR.

**eTable 11. Published Surrogate Correlation Studies for Cancer Indications Without Documented Overall Survival Benefit**

| Cancer Site                                                                             | Setting             | Line of therapy | Therapy type                                   | Surrogate measure | Correlation type                                 | Correlation coefficient type | Coefficient | Correlation coefficient (extraction of a root) | Note                                         |
|-----------------------------------------------------------------------------------------|---------------------|-----------------|------------------------------------------------|-------------------|--------------------------------------------------|------------------------------|-------------|------------------------------------------------|----------------------------------------------|
| <b>Studies obtained from previous umbrella review<sup>148</sup> (No. Indication=32)</b> |                     |                 |                                                |                   |                                                  |                              |             |                                                |                                              |
| Lung <sup>149</sup>                                                                     | advanced            | not specific    | targeted                                       | PFS               | PFS-HR and OS-HR                                 | R-squared                    | 0.2269      | 0.48                                           | ≥40% crossover                               |
| Lung <sup>150</sup>                                                                     | advanced            | 1st-line        | targeted                                       | PFS               | PFS-HR and OS-HR                                 | R-squared                    | 0.002       | 0.04                                           | molecularly selected patient trials          |
| Lung <sup>151</sup>                                                                     | advanced            | 1st-line        | targeted                                       | PFS               | PFS-OS                                           | Spearman's r                 | 0.689       | 0.69                                           |                                              |
| Lung <sup>152</sup>                                                                     | advanced            | 2nd-line        | not specific                                   | PFS               | PFS-OS                                           | r                            | 0.376       | 0.38                                           |                                              |
| Lung <sup>152</sup>                                                                     | advanced            | 2nd-line        | not specific                                   | PFS               | PFS-HR and OS-HR                                 | r                            | 0.415       | 0.42                                           |                                              |
| Lung <sup>150</sup>                                                                     | advanced            | not specific    | targeted                                       | ORR               | ORR-OR and OS-HR                                 | R-squared                    | 0.429       | 0.65                                           | in trials with molecularly selected patients |
| Breast <sup>153</sup>                                                                   | adjuvant setting    | adjuvant        | not specific                                   | DFS               | 2-year DFS differences and 5-year OS differences | r                            | 0.62        | 0.62                                           | base model                                   |
| Breast <sup>154</sup>                                                                   | neoadjuvant setting | neoadjuvant     | not specific                                   | pCR               | logOR(pCR)-logHR(OS)                             | R-squared                    | 0.09        | 0.30                                           |                                              |
| Breast <sup>155</sup>                                                                   | neoadjuvant setting | neoadjuvant     | not specific                                   | pCR               | pCR-OS                                           | R-squared                    | 0.24        | 0.49                                           | trial-level analysis                         |
| Breast <sup>156</sup>                                                                   | advanced            | 1st-line        | targeted                                       | PFS/TTP           | PFS/TTP-OS                                       | Spearman's r                 | 0.81        | 0.81                                           |                                              |
| Breast <sup>156</sup>                                                                   | advanced            | 1st-line        | targeted                                       | PFS/TTP           | PFS/TTP-HR and OS-HR                             | Spearman's r                 | 0.73        | 0.73                                           |                                              |
| Breast <sup>157</sup>                                                                   | advanced            | not specific    | anthracyclines, taxanes, or targeted therapies | PFS               | PFS-HR and OS-HR                                 | R-squared                    | 0.18        | 0.42                                           | weighted multivariate regression analysis    |
| Breast <sup>158</sup>                                                                   | advanced            | not specific    | not specific                                   | PFS               | PFS gain-OS gain                                 | R-squared                    | 0.3         | 0.55                                           |                                              |
| Breast <sup>158</sup>                                                                   | advanced            | not specific    | not specific                                   | PFS               | PFS-HR and OS-HR                                 | R-squared                    | 0.78        | 0.88                                           |                                              |

| Cancer Site                     | Setting  | Line of therapy      | Therapy type                                   | Surrogate measure | Correlation type               | Correlation coefficient type | Coefficient | Correlation coefficient (extraction of a root) | Note                                              |
|---------------------------------|----------|----------------------|------------------------------------------------|-------------------|--------------------------------|------------------------------|-------------|------------------------------------------------|---------------------------------------------------|
| Breast <sup>159</sup>           | advanced | not specific         | not specific                                   | PFS/TTP           | Progression-HR and OS-HR       | R-squared                    | 0.3         | 0.55                                           |                                                   |
| Breast <sup>160</sup>           | advanced | not specific         | not specific                                   | PFS/TTP           | PFS/TTP-OS                     | r                            | 0.428       | 0.43                                           | unweighted Spearman                               |
| Breast <sup>161</sup>           | advanced | 2nd-line or 3rd-line | not specific                                   | PFS/TTP           | PFS/TTP-OS                     | Spearman's r                 | 0.7824      | 0.78                                           |                                                   |
| Breast <sup>161</sup>           | advanced | 2nd-line or 3rd-line | not specific                                   | PFS/TTP           | Progression-HR and OS-HR       | Spearman's r                 | 0.5725      | 0.57                                           |                                                   |
| Breast <sup>157</sup>           | advanced | ≥2nd-line            | anthracyclines, taxanes, or targeted therapies | PFS               | PFS-HR and OS-HR               | R-squared                    | 0.4         | 0.63                                           | weighted multivariate regression analysis         |
| Kidney <sup>162</sup>           | advanced | 1st-line             | targeted                                       | PFS               | PFS-OS                         | Spearman's r                 | 0.869       | 0.87                                           |                                                   |
| Kidney <sup>162</sup>           | advanced | 1st-line             | targeted                                       | PFS               | PFS gain-OS gain               | Spearman's r                 | 0.36        | 0.36                                           |                                                   |
| Kidney <sup>163</sup>           | advanced | 1st-line             | targeted                                       | PFS               | 3-month PFS-9-month OS         | Pearson coefficient          | 0.82        | 0.82                                           |                                                   |
| Kidney <sup>163</sup>           | advanced | 1st-line             | targeted                                       | PFS               | 6-month PFS-12-month OS        | Pearson coefficient          | 0.85        | 0.85                                           |                                                   |
| Kidney <sup>164</sup>           | advanced | not specific         | cytokine or targeted therapies                 | PFS/TTP           | -ln HR(PFS/TTP) and -ln HR(OS) | weighted Pearson correlation | 0.8         | 0.80                                           |                                                   |
| Kidney <sup>165</sup>           | advanced | not specific         | targeted                                       | PFS               | PFS gain-OS gain               | R-squared                    | 0.44        | 0.66                                           | targeted therapy ordinary linear regression model |
| Colon and rectum <sup>166</sup> | advanced | not specific         | not specific                                   | TTP               | TTP HR and OS HR               | Spearman ρ                   | 0.8         | 0.80                                           |                                                   |
| Colon and rectum <sup>167</sup> | advanced | not specific         | chemotherapy                                   | ORR               | ORR-OR and OS-HR               | r                            | 0.42        | 0.42                                           |                                                   |
| Colon and rectum <sup>168</sup> | advanced | 2nd-line             | not specific                                   | PFS/TTP           | PFS/TTP-OS                     | R-squared                    | 0.38        | 0.62                                           |                                                   |
| Colon and rectum <sup>169</sup> | advanced | 2nd-line             | chemotherapy                                   | ORR               | ORR-OS                         | r                            | 0.58        | 0.58                                           |                                                   |
| Colon and rectum <sup>170</sup> | advanced | 2nd-line             | targeted                                       | ORR               | ORR-OR and OS-HR               | r                            | 0.169       | 0.17                                           |                                                   |

| Cancer Site                                                                                    | Setting                      | Line of therapy       | Therapy type  | Surrogate measure | Correlation type          | Correlation coefficient type | Coefficient | Correlation coefficient (extraction of a root) | Note                                  |
|------------------------------------------------------------------------------------------------|------------------------------|-----------------------|---------------|-------------------|---------------------------|------------------------------|-------------|------------------------------------------------|---------------------------------------|
| Ovaries <sup>158</sup>                                                                         | advanced                     | not specific          | not specific  | PFS               | PFS gain-OS gain          | R-squared                    | 0.6         | 0.77                                           |                                       |
| Ovaries <sup>158</sup>                                                                         | advanced                     | not specific          | not specific  | PFS               | PFS-HR and OS-HR          | R-squared                    | 0.73        | 0.85                                           |                                       |
| Ovaries <sup>171</sup>                                                                         | advanced                     | 2nd-line or later     | not specific  | ORR               | ORR-OS                    | R-squared                    | 0.67        | 0.82                                           |                                       |
| Urothelial <sup>172</sup>                                                                      | advanced                     | not specific          | immunotherapy | ORR               | ORR-OS                    | r                            | -0.12       | -0.12                                          | urothelial carcinoma                  |
| Prostate <sup>173</sup>                                                                        | nonmetastatic                | 1st-line              | not specific  | MFS               | MFS-OS                    | Kendall's $\tau$             | 0.91        | 0.91                                           | weighted linear regression            |
| Prostate <sup>174</sup>                                                                        | nonmetastatic                | 1st-line              | apalutamide   | MFS               | MFS-OS                    | Fleischer method coefficient | 0.69        | 0.69                                           | retrospective analysis of NCT01946204 |
| <b>Studies obtained from additional search (No. Indication=6, see eBox 2 for search terms)</b> |                              |                       |               |                   |                           |                              |             |                                                |                                       |
| Melanoma <sup>175</sup>                                                                        | advanced                     | not specific          | not specific  | PFS               | PFS-OS                    | R-squared                    | 0.075       | 0.27                                           |                                       |
| Melanoma <sup>176</sup>                                                                        | advanced                     | not specific          | immunotherapy | PFS               | PFS-OS                    | R-squared                    | 0.82        | 0.91                                           | in sample size                        |
| Melanoma <sup>176</sup>                                                                        | advanced                     | not specific          | immunotherapy | PFS               | PFS-HR and OS-HR          | R-squared                    | 0.75        | 0.87                                           | in sample size                        |
| Melanoma <sup>176</sup>                                                                        | advanced                     | not specific          | immunotherapy | PFS               | PFS gain-OS gain          | R-squared                    | 0.72        | 0.85                                           | in sample size                        |
| Melanoma <sup>176</sup>                                                                        | advanced                     | not specific          | immunotherapy | ORR               | ORR-OS                    | R-squared                    | 0.25        | 0.50                                           | in sample size                        |
| Soft tissue sarcoma <sup>177</sup>                                                             | advanced                     | 2nd-line              | not specific  | PFS               | PFS-OS                    | r                            | 0.402       | 0.40                                           |                                       |
| Brain-glioblastoma <sup>178</sup>                                                              | recurrent                    | not specific          | targeted      | PFS               | PFS-OS                    | R-squared                    | 0.15        | 0.39                                           |                                       |
| Brain-glioblastoma <sup>179</sup>                                                              | newly diagnosed or recurrent | not specific          | targeted      | PFS               | 6-month PFS%-12-month OS% | r                            | 0.53        | 0.53                                           |                                       |
| Liver <sup>180</sup>                                                                           | unresectable                 | 1st-line and 2nd-line | not specific  | PFS               | PFS-OS                    | r                            | 0.84        | 0.84                                           | PFS with an HR between 0.6-0.7        |
| Liver <sup>181</sup>                                                                           | unresectable                 | not specific          | immunotherapy | ORR               | ORR-OS                    | Spearman's r                 | 0.35        | 0.59                                           |                                       |
| <b>No relevant study was found by additional search (No. Indication=35)</b>                    |                              |                       |               |                   |                           |                              |             |                                                |                                       |
| Liver                                                                                          | unresectable                 | 1st-line              | targeted      | ORR               |                           |                              |             |                                                |                                       |

| Cancer Site                     | Setting      | Line of therapy   | Therapy type | Surrogate measure | Correlation type | Correlation coefficient type | Coefficient | Correlation coefficient (extraction of a root) | Note |
|---------------------------------|--------------|-------------------|--------------|-------------------|------------------|------------------------------|-------------|------------------------------------------------|------|
| Prostate                        | advanced     | 1st-line          | not specific | testosterone      |                  |                              |             |                                                |      |
| Melanoma                        | advanced     | adjuvant          | targeted     | RFS               |                  |                              |             |                                                |      |
| Brain-anaplastic astrocytoma    | relapsed     | 2nd-line          | chemotherapy | PFS               |                  |                              |             |                                                |      |
| Head and neck-Thyroid           | metastatic   | 1st-line          | targeted     | PFS               |                  |                              |             |                                                |      |
| Neuroendocrine Tumor            | advanced     | 1st-line          | targeted     | PFS               |                  |                              |             |                                                |      |
| Hodgkin lymphoma                | relapsed     | 2nd-line or later | not specific | ORR               |                  |                              |             |                                                |      |
| non-Hodgkin lymphoma            | relapsed     | 2nd-line or later | not specific | ORR               |                  |                              |             |                                                |      |
| Gastrointestinal stromal tumor  | advanced     | 2nd-line          | targeted     | PFS               |                  |                              |             |                                                |      |
| Waldenström's macroglobulinemia | not specific | 1st-line          | targeted     | PFS               |                  |                              |             |                                                |      |
| Myelodysplastic syndromes       | not specific | 1st-line          | chemotherapy | ORR               |                  |                              |             |                                                |      |
| leukemia                        | not specific | not specific      | not specific | ORR               |                  |                              |             |                                                |      |
| Bone                            | not specific | not specific      | not specific | ORR               |                  |                              |             |                                                |      |
| Multiple myeloma                | not specific | not specific      | not specific | ORR               |                  |                              |             |                                                |      |

**Abbreviation:** OS, overall survival; HR, hazard ratio; PFS, progression-free survival; DFS, disease-free survival; pCR, pathologic complete response; ORR, objective response rate; MFS, metastatic-free survival; TTP, time-to-progression; RFS, relapse-free survival.

## References.

1. Fizazi K, Scher HI, Molina A, et al. Abiraterone acetate for treatment of metastatic castration-resistant prostate cancer: final overall survival analysis of the COU-AA-301 randomised, double-blind, placebo-controlled phase 3 study. *Lancet Oncol* 2012;13(10):983-92. doi: 10.1016/s1470-2045(12)70379-0 [published Online First: 2012/09/22]
2. Yang JC, Wu YL, Schuler M, et al. Afatinib versus cisplatin-based chemotherapy for EGFR mutation-positive lung adenocarcinoma (LUX-Lung 3 and LUX-Lung 6): analysis of overall survival data from two randomised, phase 3 trials. *Lancet Oncol* 2015;16(2):141-51. doi: 10.1016/s1470-2045(14)71173-8 [published Online First: 2015/01/16]
3. Sternberg CN, Hawkins RE, Wagstaff J, et al. A randomised, double-blind phase III study of pazopanib in patients with advanced and/or metastatic renal cell carcinoma: final overall survival results and safety update. *Eur J Cancer* 2013;49(6):1287-96. doi: 10.1016/j.ejca.2012.12.010 [published Online First: 2013/01/17]
4. Shi Y, Zhang L, Liu X, et al. Icotinib versus gefitinib in previously treated advanced non-small-cell lung cancer (ICOGEN): a randomised, double-blind phase 3 non-inferiority trial. *Lancet Oncol* 2013;14(10):953-61. doi: 10.1016/s1470-2045(13)70355-3 [published Online First: 2013/08/21]
5. Smith MR, Saad F, Chowdhury S, et al. Apalutamide Treatment and Metastasis-free Survival in Prostate Cancer. *N Engl J Med* 2018;378(15):1408-18. doi: 10.1056/NEJMoa1715546 [published Online First: 2018/02/09]
6. Long GV, Hauschild A, Santinami M, et al. Adjuvant Dabrafenib plus Trametinib in Stage III BRAF-Mutated Melanoma. *N Engl J Med* 2017;377(19):1813-23. doi: 10.1056/NEJMoa1708539 [published Online First: 2017/09/12]
7. Zhang L, Meng L, Liu B, et al. Flumatinib versus Imatinib for Newly Diagnosed Chronic Phase Chronic Myeloid Leukemia: A Phase III, Randomized, Open-label, Multi-center FESnd Study. *Clin Cancer Res* 2021;27(1):70-77. doi: 10.1158/1078-0432.Ccr-20-1600 [published Online First: 2020/09/16]
8. Mirza MR, Monk BJ, Herrstedt J, et al. Niraparib Maintenance Therapy in Platinum-Sensitive, Recurrent Ovarian Cancer. *N Engl J Med* 2016;375(22):2154-64. doi: 10.1056/NEJMoa1611310 [published Online First: 2016/10/09]
9. Song Y, Wu J, Chen X, et al. A Single-Arm, Multicenter, Phase II Study of Camrelizumab in Relapsed or Refractory Classical Hodgkin Lymphoma. *Clin Cancer Res* 2019;25(24):7363-69. doi: 10.1158/1078-0432.Ccr-19-1680 [published Online First: 2019/08/20]
10. Soria JC, Felip E, Cobo M, et al. Afatinib versus erlotinib as second-line treatment of patients with advanced squamous cell carcinoma of the lung (LUX-Lung 8): an open-label randomised controlled phase 3 trial. *Lancet Oncol* 2015;16(8):897-907. doi: 10.1016/s1470-2045(15)00006-6 [published Online First: 2015/07/15]
11. Mok T, Camidge DR, Gadgeel SM, et al. Updated overall survival and final progression-free survival data for patients with treatment-naive advanced ALK-positive non-small-cell lung cancer in the ALEX study. *Ann Oncol* 2020;31(8):1056-64. doi: 10.1016/j.annonc.2020.04.478 [published Online First: 2020/05/19]



12. Horn L, Mansfield AS, Szczesna A, et al. First-Line Atezolizumab plus Chemotherapy in Extensive-Stage Small-Cell Lung Cancer. *N Engl J Med* 2018;379(23):2220-29. doi: 10.1056/NEJMoa1809064 [published Online First: 2018/10/04]
13. Han B, Li K, Wang Q, et al. Effect of Anlotinib as a Third-Line or Further Treatment on Overall Survival of Patients With Advanced Non-Small Cell Lung Cancer: The ALTER 0303 Phase 3 Randomized Clinical Trial. *JAMA Oncol* 2018;4(11):1569-75. doi: 10.1001/jamaoncol.2018.3039 [published Online First: 2018/08/12]
14. Ramalingam SS, Vansteenkiste J, Planchard D, et al. Overall Survival with Osimertinib in Untreated, EGFR-Mutated Advanced NSCLC. *N Engl J Med* 2020;382(1):41-50. doi: 10.1056/NEJMoa1913662 [published Online First: 2019/11/22]
15. Zhou C, Wu YL, Chen G, et al. BEYOND: A Randomized, Double-Blind, Placebo-Controlled, Multicenter, Phase III Study of First-Line Carboplatin/Paclitaxel Plus Bevacizumab or Placebo in Chinese Patients With Advanced or Recurrent Nonsquamous Non-Small-Cell Lung Cancer. *J Clin Oncol* 2015;33(19):2197-204. doi: 10.1200/jco.2014.59.4424 [published Online First: 2015/05/28]
16. Mok TS, Cheng Y, Zhou X, et al. Updated Overall Survival in a Randomized Study Comparing Dacomitinib with Gefitinib as First-Line Treatment in Patients with Advanced Non-Small-Cell Lung Cancer and EGFR-Activating Mutations. *Drugs* 2021;81(2):257-66. doi: 10.1007/s40265-020-01441-6 [published Online First: 2020/12/18]
17. Gray JE, Villegas A, Daniel D, et al. Three-Year Overall Survival with Durvalumab after Chemoradiotherapy in Stage III NSCLC-Update from PACIFIC. *J Thorac Oncol* 2020;15(2):288-93. doi: 10.1016/j.jtho.2019.10.002 [published Online First: 2019/10/18]
18. Cappuzzo F, Ciuleanu T, Stelmakh L, et al. Erlotinib as maintenance treatment in advanced non-small-cell lung cancer: a multicentre, randomised, placebo-controlled phase 3 study. *Lancet Oncol* 2010;11(6):521-9. doi: 10.1016/s1470-2045(10)70112-1 [published Online First: 2010/05/25]
19. Solomon BJ, Kim DW, Wu YL, et al. Final Overall Survival Analysis From a Study Comparing First-Line Crizotinib Versus Chemotherapy in ALK-Mutation-Positive Non-Small-Cell Lung Cancer. *J Clin Oncol* 2018;36(22):2251-58. doi: 10.1200/jco.2017.77.4794 [published Online First: 2018/05/17]
20. Brahmer J, Reckamp KL, Baas P, et al. Nivolumab versus Docetaxel in Advanced Squamous-Cell Non-Small-Cell Lung Cancer. *N Engl J Med* 2015;373(2):123-35. doi: 10.1056/NEJMoa1504627 [published Online First: 2015/06/02]
21. Gadgeel S, Rodríguez-Abreu D, Speranza G, et al. Updated Analysis From KEYNOTE-189: Pembrolizumab or Placebo Plus Pemetrexed and Platinum for Previously Untreated Metastatic Nonsquamous Non-Small-Cell Lung Cancer. *J Clin Oncol* 2020;38(14):1505-17. doi: 10.1200/jco.19.03136 [published Online First: 2020/03/10]
22. Wu YL, Zhang L, Fan Y, et al. Randomized clinical trial of pembrolizumab vs chemotherapy for previously untreated Chinese patients with PD-L1-positive locally advanced or metastatic non-small-cell lung cancer: KEYNOTE-042 China Study. *Int J Cancer* 2021;148(9):2313-20. doi: 10.1002/ijc.33399 [published Online First: 2020/11/25]

23. Paz-Ares L, Vicente D, Tafreshi A, et al. A Randomized, Placebo-Controlled Trial of Pembrolizumab Plus Chemotherapy in Patients With Metastatic Squamous NSCLC: Protocol-Specified Final Analysis of KEYNOTE-407. *J Thorac Oncol* 2020;15(10):1657-69. doi: 10.1016/j.jtho.2020.06.015 [published Online First: 2020/07/01]
24. Scagliotti GV, Parikh P, von Pawel J, et al. Phase III study comparing cisplatin plus gemcitabine with cisplatin plus pemetrexed in chemotherapy-naive patients with advanced-stage non-small-cell lung cancer. *J Clin Oncol* 2008;26(21):3543-51. doi: 10.1200/jco.2007.15.0375 [published Online First: 2008/05/29]
25. Ciuleanu T, Brodowicz T, Zielinski C, et al. Maintenance pemetrexed plus best supportive care versus placebo plus best supportive care for non-small-cell lung cancer: a randomised, double-blind, phase 3 study. *Lancet* 2009;374(9699):1432-40. doi: 10.1016/s0140-6736(09)61497-5 [published Online First: 2009/09/22]
26. Fizazi K, Tran N, Fein L, et al. Abiraterone acetate plus prednisone in patients with newly diagnosed high-risk metastatic castration-sensitive prostate cancer (LATITUDE): final overall survival analysis of a randomised, double-blind, phase 3 trial. *Lancet Oncol* 2019;20(5):686-700. doi: 10.1016/s1470-2045(19)30082-8 [published Online First: 2019/04/17]
27. Chi KN, Agarwal N, Bjartell A, et al. Apalutamide for Metastatic, Castration-Sensitive Prostate Cancer. *N Engl J Med* 2019;381(1):13-24. doi: 10.1056/NEJMoa1903307 [published Online First: 2019/06/01]
28. Armstrong AJ, Lin P, Tombal B, et al. Five-year Survival Prediction and Safety Outcomes with Enzalutamide in Men with Chemotherapy-naïve Metastatic Castration-resistant Prostate Cancer from the PREVAIL Trial. *Eur Urol* 2020;78(3):347-57. doi: 10.1016/j.eururo.2020.04.061 [published Online First: 2020/06/13]
29. Sternberg CN, Fizazi K, Saad F, et al. Enzalutamide and Survival in Nonmetastatic, Castration-Resistant Prostate Cancer. *N Engl J Med* 2020;382(23):2197-206. doi: 10.1056/NEJMoa2003892 [published Online First: 2020/05/30]
30. Parker C, Nilsson S, Heinrich D, et al. Alpha emitter radium-223 and survival in metastatic prostate cancer. *N Engl J Med* 2013;369(3):213-23. doi: 10.1056/NEJMoa1213755 [published Online First: 2013/07/19]
31. Hurwitz H, Fehrenbacher L, Novotny W, et al. Bevacizumab plus irinotecan, fluorouracil, and leucovorin for metastatic colorectal cancer. *N Engl J Med* 2004;350(23):2335-42. doi: 10.1056/NEJMoa032691 [published Online First: 2004/06/04]
32. Li J, Qin S, Xu RH, et al. Effect of Fruquintinib vs Placebo on Overall Survival in Patients With Previously Treated Metastatic Colorectal Cancer: The FRESCO Randomized Clinical Trial. *Jama* 2018;319(24):2486-96. doi: 10.1001/jama.2018.7855 [published Online First: 2018/06/28]
33. Mayer RJ, Van Cutsem E, Falcone A, et al. Randomized trial of TAS-102 for refractory metastatic colorectal cancer. *N Engl J Med* 2015;372(20):1909-19. doi: 10.1056/NEJMoa1414325 [published Online First: 2015/05/15]

34. Li J, Qin S, Xu R, et al. Regorafenib plus best supportive care versus placebo plus best supportive care in Asian patients with previously treated metastatic colorectal cancer (CONCUR): a randomised, double-blind, placebo-controlled, phase 3 trial. *Lancet Oncol* 2015;16(6):619-29. doi: 10.1016/s1470-2045(15)70156-7 [published Online First: 2015/05/20]
35. Facon T, Dimopoulos MA, Dispenzieri A, et al. Final analysis of survival outcomes in the phase 3 FIRST trial of up-front treatment for multiple myeloma. *Blood* 2018;131(3):301-10. doi: 10.1182/blood-2017-07-795047 [published Online First: 2017/11/19]
36. Dimopoulos M, Spencer A, Attal M, et al. Lenalidomide plus dexamethasone for relapsed or refractory multiple myeloma. *N Engl J Med* 2007;357(21):2123-32. doi: 10.1056/NEJMoa070594 [published Online First: 2007/11/23]
37. Richardson PG, Sonneveld P, Schuster M, et al. Extended follow-up of a phase 3 trial in relapsed multiple myeloma: final time-to-event results of the APEX trial. *Blood* 2007;110(10):3557-60. doi: 10.1182/blood-2006-08-036947 [published Online First: 2007/08/11]
38. San Miguel JF, Schlag R, Khuageva NK, et al. Persistent overall survival benefit and no increased risk of second malignancies with bortezomib-melphalan-prednisone versus melphalan-prednisone in patients with previously untreated multiple myeloma. *J Clin Oncol* 2013;31(4):448-55. doi: 10.1200/jco.2012.41.6180 [published Online First: 2012/12/13]
39. San Miguel JF, Schlag R, Khuageva NK, et al. Bortezomib plus melphalan and prednisone for initial treatment of multiple myeloma. *N Engl J Med* 2008;359(9):906-17. doi: 10.1056/NEJMoa0801479 [published Online First: 2008/08/30]
40. Hou J, Jin J, Xu Y, et al. Randomized, double-blind, placebo-controlled phase III study of ixazomib plus lenalidomide-dexamethasone in patients with relapsed/refractory multiple myeloma: China Continuation study. *J Hematol Oncol* 2017;10(1):137. doi: 10.1186/s13045-017-0501-4 [published Online First: 2017/07/08]
41. Cortes J, O'Shaughnessy J, Loesch D, et al. Eribulin monotherapy versus treatment of physician's choice in patients with metastatic breast cancer (EMBRACE): a phase 3 open-label randomised study. *Lancet* 2011;377(9769):914-23. doi: 10.1016/s0140-6736(11)60070-6 [published Online First: 2011/03/08]
42. Swain SM, Miles D, Kim SB, et al. Pertuzumab, trastuzumab, and docetaxel for HER2-positive metastatic breast cancer (CLEOPATRA): end-of-study results from a double-blind, randomised, placebo-controlled, phase 3 study. *Lancet Oncol* 2020;21(4):519-30. doi: 10.1016/s1470-2045(19)30863-0 [published Online First: 2020/03/17]
43. Li J, Qin S, Xu J, et al. Apatinib for chemotherapy-refractory advanced metastatic gastric cancer: results from a randomized, placebo-controlled, parallel-arm, phase II trial. *J Clin Oncol* 2013;31(26):3219-25. doi: 10.1200/jco.2013.48.8585 [published Online First: 2013/08/07]
44. Kang YK, Boku N, Satoh T, et al. Nivolumab in patients with advanced gastric or gastro-oesophageal junction cancer refractory to, or intolerant of, at least two previous chemotherapy regimens (ONO-4538-12, ATTRACTION-2): a randomised, double-blind, placebo-controlled, phase 3 trial. *Lancet* 2017;390(10111):2461-71. doi: 10.1016/s0140-6736(17)31827-5 [published Online First: 2017/10/11]

45. Burtness B, Harrington KJ, Greil R, et al. Pembrolizumab alone or with chemotherapy versus cetuximab with chemotherapy for recurrent or metastatic squamous cell carcinoma of the head and neck (KEYNOTE-048): a randomised, open-label, phase 3 study. *Lancet* 2019;394(10212):1915-28. doi: 10.1016/s0140-6736(19)32591-7 [published Online First: 2019/11/05]
46. Vermorken JB, Mesia R, Rivera F, et al. Platinum-based chemotherapy plus cetuximab in head and neck cancer. *N Engl J Med* 2008;359(11):1116-27. doi: 10.1056/NEJMoa0802656 [published Online First: 2008/09/12]
47. Fenaux P, Mufti GJ, Hellstrom-Lindberg E, et al. Efficacy of azacitidine compared with that of conventional care regimens in the treatment of higher-risk myelodysplastic syndromes: a randomised, open-label, phase III study. *Lancet Oncol* 2009;10(3):223-32. doi: 10.1016/s1470-2045(09)70003-8 [published Online First: 2009/02/24]
48. Munir T, Brown JR, O'Brien S, et al. Final analysis from RESONATE: Up to six years of follow-up on ibrutinib in patients with previously treated chronic lymphocytic leukemia or small lymphocytic lymphoma. *Am J Hematol* 2019;94(12):1353-63. doi: 10.1002/ajh.25638 [published Online First: 2019/09/13]
49. Kantarjian H, Stein A, Gökbuget N, et al. Blinatumomab versus Chemotherapy for Advanced Acute Lymphoblastic Leukemia. *N Engl J Med* 2017;376(9):836-47. doi: 10.1056/NEJMoa1609783 [published Online First: 2017/03/02]
50. Long GV, Stroyakovskiy D, Gogas H, et al. Dabrafenib and trametinib versus dabrafenib and placebo for Val600 BRAF-mutant melanoma: a multicentre, double-blind, phase 3 randomised controlled trial. *Lancet* 2015;386(9992):444-51. doi: 10.1016/s0140-6736(15)60898-4 [published Online First: 2015/06/04]
51. Chapman PB, Robert C, Larkin J, et al. Vemurafenib in patients with BRAFV600 mutation-positive metastatic melanoma: final overall survival results of the randomized BRIM-3 study. *Ann Oncol* 2017;28(10):2581-87. doi: 10.1093/annonc/mdx339 [published Online First: 2017/09/30]
52. Qin S, Li Q, Gu S, et al. Apatinib as second-line or later therapy in patients with advanced hepatocellular carcinoma (AHELP): a multicentre, double-blind, randomised, placebo-controlled, phase 3 trial. *Lancet Gastroenterol Hepatol* 2021;6(7):559-68. doi: 10.1016/s2468-1253(21)00109-6 [published Online First: 2021/05/11]
53. Finn RS, Qin S, Ikeda M, et al. Atezolizumab plus Bevacizumab in Unresectable Hepatocellular Carcinoma. *N Engl J Med* 2020;382(20):1894-905. doi: 10.1056/NEJMoa1915745 [published Online First: 2020/05/14]
54. Llovet JM, Ricci S, Mazzaferro V, et al. Sorafenib in advanced hepatocellular carcinoma. *N Engl J Med* 2008;359(4):378-90. doi: 10.1056/NEJMoa0708857 [published Online First: 2008/07/25]
55. Huang J, Xu J, Chen Y, et al. Camrelizumab versus investigator's choice of chemotherapy as second-line therapy for advanced or metastatic oesophageal squamous cell carcinoma (ESCOR): a multicentre, randomised, open-label, phase 3 study. *Lancet Oncol* 2020;21(6):832-42. doi: 10.1016/s1470-2045(20)30110-8 [published Online First: 2020/05/18]

56. Poveda A, Floquet A, Ledermann JA, et al. Olaparib tablets as maintenance therapy in patients with platinum-sensitive relapsed ovarian cancer and a BRCA1/2 mutation (SOLO2/ENGOT-Ov21): a final analysis of a double-blind, randomised, placebo-controlled, phase 3 trial. *Lancet Oncol* 2021;22(5):620-31. doi: 10.1016/s1470-2045(21)00073-5 [published Online First: 2021/03/22]
57. González-Martín A, Pothuri B, Vergote I, et al. Niraparib in Patients with Newly Diagnosed Advanced Ovarian Cancer. *N Engl J Med* 2019;381(25):2391-402. doi: 10.1056/NEJMoa1910962 [published Online First: 2019/09/29]
58. Robak T, Jin J, Pylypenko H, et al. Frontline bortezomib, rituximab, cyclophosphamide, doxorubicin, and prednisone (VR-CAP) versus rituximab, cyclophosphamide, doxorubicin, vincristine, and prednisone (R-CHOP) in transplantation-ineligible patients with newly diagnosed mantle cell lymphoma: final overall survival results of a randomised, open-label, phase 3 study. *Lancet Oncol* 2018;19(11):1449-58. doi: 10.1016/s1470-2045(18)30685-5 [published Online First: 2018/10/24]
59. Stupp R, Mason WP, van den Bent MJ, et al. Radiotherapy plus concomitant and adjuvant temozolomide for glioblastoma. *N Engl J Med* 2005;352(10):987-96. doi: 10.1056/NEJMoa043330 [published Online First: 2005/03/11]
60. Vogelzang NJ, Rusthoven JJ, Symanowski J, et al. Phase III study of pemetrexed in combination with cisplatin versus cisplatin alone in patients with malignant pleural mesothelioma. *J Clin Oncol* 2003;21(14):2636-44. doi: 10.1200/jco.2003.11.136 [published Online First: 2003/07/16]
61. Faivre S, Niccoli P, Castellano D, et al. Sunitinib in pancreatic neuroendocrine tumors: updated progression-free survival and final overall survival from a phase III randomized study. *Ann Oncol* 2017;28(2):339-43. doi: 10.1093/annonc/mdw561 [published Online First: 2016/11/12]
62. Raymond E, Dahan L, Raoul JL, et al. Sunitinib malate for the treatment of pancreatic neuroendocrine tumors. *N Engl J Med* 2011;364(6):501-13. doi: 10.1056/NEJMoa1003825 [published Online First: 2011/02/11]
63. Demetri GD, van Oosterom AT, Garrett CR, et al. Efficacy and safety of sunitinib in patients with advanced gastrointestinal stromal tumour after failure of imatinib: a randomised controlled trial. *Lancet* 2006;368(9544):1329-38. doi: 10.1016/s0140-6736(06)69446-4 [published Online First: 2006/10/19]
64. Zhou C, Chen G, Huang Y, et al. Camrelizumab plus carboplatin and pemetrexed versus chemotherapy alone in chemotherapy-naive patients with advanced non-squamous non-small-cell lung cancer (CameL): a randomised, open-label, multicentre, phase 3 trial. *Lancet Respir Med* 2021;9(3):305-14. doi: 10.1016/s2213-2600(20)30365-9 [published Online First: 2020/12/22]
65. Soria JC, Tan DSW, Chiari R, et al. First-line ceritinib versus platinum-based chemotherapy in advanced ALK-rearranged non-small-cell lung cancer (ASCEND-4): a randomised, open-label, phase 3 study. *Lancet* 2017;389(10072):917-29. doi: 10.1016/s0140-6736(17)30123-x [published Online First: 2017/01/28]
66. Shaw AT, Kim TM, Crinò L, et al. Ceritinib versus chemotherapy in patients with ALK-rearranged non-small-cell lung cancer previously given chemotherapy and crizotinib (ASCEND-5): a randomised, controlled, open-label, phase 3 trial. *Lancet Oncol* 2017;18(7):874-86. doi: 10.1016/s1470-2045(17)30339-x [published Online First: 2017/06/13]

67. Wu YL, Zhou C, Liam CK, et al. First-line erlotinib versus gemcitabine/cisplatin in patients with advanced EGFR mutation-positive non-small-cell lung cancer: analyses from the phase III, randomized, open-label, ENSURE study. *Ann Oncol* 2015;26(9):1883-89. doi: 10.1093/annonc/mdv270 [published Online First: 2015/06/25]
68. Rosell R, Carcereny E, Gervais R, et al. Erlotinib versus standard chemotherapy as first-line treatment for European patients with advanced EGFR mutation-positive non-small-cell lung cancer (EURTAC): a multicentre, open-label, randomised phase 3 trial. *Lancet Oncol* 2012;13(3):239-46. doi: 10.1016/s1470-2045(11)70393-x [published Online First: 2012/01/31]
69. Zhou C, Wu YL, Chen G, et al. Erlotinib versus chemotherapy as first-line treatment for patients with advanced EGFR mutation-positive non-small-cell lung cancer (OPTIMAL, CTONG-0802): a multicentre, open-label, randomised, phase 3 study. *Lancet Oncol* 2011;12(8):735-42. doi: 10.1016/s1470-2045(11)70184-x [published Online First: 2011/07/26]
70. Zhou C, Wu YL, Chen G, et al. Final overall survival results from a randomised, phase III study of erlotinib versus chemotherapy as first-line treatment of EGFR mutation-positive advanced non-small-cell lung cancer (OPTIMAL, CTONG-0802). *Ann Oncol* 2015;26(9):1877-83. doi: 10.1093/annonc/mdv276 [published Online First: 2015/07/05]
71. Mok TS, Wu YL, Ahn MJ, et al. Osimertinib or Platinum-Pemetrexed in EGFR T790M-Positive Lung Cancer. *N Engl J Med* 2017;376(7):629-40. doi: 10.1056/NEJMoa1612674 [published Online First: 2016/12/14]
72. Papadimitrakopoulou VA, Mok TS, Han JY, et al. Osimertinib versus platinum-pemetrexed for patients with EGFR T790M advanced NSCLC and progression on a prior EGFR-tyrosine kinase inhibitor: AURA3 overall survival analysis. *Ann Oncol* 2020;31(11):1536-44. doi: 10.1016/j.annonc.2020.08.2100 [published Online First: 2020/08/31]
73. Sun Y, Wu YL, Zhou CC, et al. Second-line pemetrexed versus docetaxel in Chinese patients with locally advanced or metastatic non-small cell lung cancer: a randomized, open-label study. *Lung Cancer* 2013;79(2):143-50. doi: 10.1016/j.lungcan.2012.10.015 [published Online First: 2012/11/28]
74. Hanna N, Shepherd FA, Fossella FV, et al. Randomized phase III trial of pemetrexed versus docetaxel in patients with non-small-cell lung cancer previously treated with chemotherapy. *J Clin Oncol* 2004;22(9):1589-97. doi: 10.1200/jco.2004.08.163 [published Online First: 2004/05/01]
75. Johnston S, Martin M, Di Leo A, et al. MONARCH 3 final PFS: a randomized study of abemaciclib as initial therapy for advanced breast cancer. *NPJ Breast Cancer* 2019;5:5. doi: 10.1038/s41523-018-0097-z [published Online First: 2019/01/25]
76. Goetz MP, Toi M, Campone M, et al. MONARCH 3: Abemaciclib As Initial Therapy for Advanced Breast Cancer. *J Clin Oncol* 2017;35(32):3638-46. doi: 10.1200/jco.2017.75.6155 [published Online First: 2017/10/03]
77. Zhang QY, Sun T, Yin YM, et al. MONARCH plus: abemaciclib plus endocrine therapy in women with HR+/HER2- advanced breast cancer: the multinational randomized phase III study. *Ther Adv Med Oncol* 2020;12:1758835920963925. doi: 10.1177/1758835920963925 [published Online First: 2020/11/06]

78. Cameron D, Casey M, Press M, et al. A phase III randomized comparison of lapatinib plus capecitabine versus capecitabine alone in women with advanced breast cancer that has progressed on trastuzumab: updated efficacy and biomarker analyses. *Breast Cancer Res Treat* 2008;112(3):533-43. doi: 10.1007/s10549-007-9885-0 [published Online First: 2008/01/12]
79. Cameron D, Casey M, Oliva C, et al. Lapatinib plus capecitabine in women with HER-2-positive advanced breast cancer: final survival analysis of a phase III randomized trial. *Oncologist* 2010;15(9):924-34. doi: 10.1634/theoncologist.2009-0181 [published Online First: 2010/08/26]
80. von Minckwitz G, Procter M, de Azambuja E, et al. Adjuvant Pertuzumab and Trastuzumab in Early HER2-Positive Breast Cancer. *N Engl J Med* 2017;377(2):122-31. doi: 10.1056/NEJMoa1703643 [published Online First: 2017/06/06]
81. Piccart M, Procter M, Fumagalli D, et al. Adjuvant Pertuzumab and Trastuzumab in Early HER2-Positive Breast Cancer in the APHINITY Trial: 6 Years' Follow-Up. *J Clin Oncol* 2021;39(13):1448-57. doi: 10.1200/jco.20.01204 [published Online First: 2021/02/05]
82. von Minckwitz G, Huang CS, Mano MS, et al. Trastuzumab Emtansine for Residual Invasive HER2-Positive Breast Cancer. *N Engl J Med* 2019;380(7):617-28. doi: 10.1056/NEJMoa1814017 [published Online First: 2018/12/06]
83. Qin S, Bi F, Jin J, et al. Axitinib versus sorafenib as a second-line therapy in Asian patients with metastatic renal cell carcinoma: results from a randomized registrational study. *Onco Targets Ther* 2015;8:1363-73. doi: 10.2147/ott.S83302 [published Online First: 2015/06/20]
84. Hutson TE, Al-Shukri S, Stus VP, et al. Axitinib Versus Sorafenib in First-Line Metastatic Renal Cell Carcinoma: Overall Survival From a Randomized Phase III Trial. *Clin Genitourin Cancer* 2017;15(1):72-76. doi: 10.1016/j.clgc.2016.05.008 [published Online First: 2016/08/09]
85. Rini BI, Escudier B, Tomczak P, et al. Comparative effectiveness of axitinib versus sorafenib in advanced renal cell carcinoma (AXIS): a randomised phase 3 trial. *Lancet* 2011;378(9807):1931-9. doi: 10.1016/s0140-6736(11)61613-9 [published Online First: 2011/11/08]
86. Motzer RJ, Escudier B, Tomczak P, et al. Axitinib versus sorafenib as second-line treatment for advanced renal cell carcinoma: overall survival analysis and updated results from a randomised phase 3 trial. *Lancet Oncol* 2013;14(6):552-62. doi: 10.1016/s1470-2045(13)70093-7 [published Online First: 2013/04/20]
87. Motzer RJ, Hutson TE, Tomczak P, et al. Sunitinib versus interferon alfa in metastatic renal-cell carcinoma. *N Engl J Med* 2007;356(2):115-24. doi: 10.1056/NEJMoa065044 [published Online First: 2007/01/12]
88. Escudier B, Eisen T, Stadler WM, et al. Sorafenib in advanced clear-cell renal-cell carcinoma. *N Engl J Med* 2007;356(2):125-34. doi: 10.1056/NEJMoa060655 [published Online First: 2007/01/12]
89. Motzer RJ, Escudier B, Oudard S, et al. Efficacy of everolimus in advanced renal cell carcinoma: a double-blind, randomised, placebo-controlled phase III trial. *Lancet* 2008;372(9637):449-56. doi: 10.1016/s0140-6736(08)61039-9 [published Online First: 2008/07/26]
90. Motzer RJ, Escudier B, Oudard S, et al. Phase 3 trial of everolimus for metastatic renal cell carcinoma : final results and analysis of prognostic factors. *Cancer* 2010;116(18):4256-65. doi: 10.1002/cncr.25219 [published Online First: 2010/06/16]

91. Dummer R, Hauschild A, Santinami M, et al. Five-Year Analysis of Adjuvant Dabrafenib plus Trametinib in Stage III Melanoma. *N Engl J Med* 2020;383(12):1139-48. doi: 10.1056/NEJMoa2005493 [published Online First: 2020/09/03]
92. Ribas A, Puzanov I, Dummer R, et al. Pembrolizumab versus investigator-choice chemotherapy for ipilimumab-refractory melanoma (KEYNOTE-002): a randomised, controlled, phase 2 trial. *Lancet Oncol* 2015;16(8):908-18. doi: 10.1016/s1470-2045(15)00083-2 [published Online First: 2015/06/28]
93. Hamid O, Puzanov I, Dummer R, et al. Final analysis of a randomised trial comparing pembrolizumab versus investigator-choice chemotherapy for ipilimumab-refractory advanced melanoma. *Eur J Cancer* 2017;86:37-45. doi: 10.1016/j.ejca.2017.07.022 [published Online First: 2017/09/30]
94. Ellingson BM, Kim HJ, Woodworth DC, et al. Recurrent glioblastoma treated with bevacizumab: contrast-enhanced T1-weighted subtraction maps improve tumor delineation and aid prediction of survival in a multicenter clinical trial. *Radiology* 2014;271(1):200-10. doi: 10.1148/radiol.13131305 [published Online First: 2014/01/31]
95. Wick W, Gorlia T, Bendszus M, et al. Lomustine and Bevacizumab in Progressive Glioblastoma. *N Engl J Med* 2017;377(20):1954-63. doi: 10.1056/NEJMoa1707358 [published Online First: 2017/11/16]
96. Yung WK, Albright RE, Olson J, et al. A phase II study of temozolomide vs. procarbazine in patients with glioblastoma multiforme at first relapse. *Br J Cancer* 2000;83(5):588-93. doi: 10.1054/bjoc.2000.1316 [published Online First: 2000/08/17]
97. Sun J, Yang XJ, Yang SY. [Multicenter randomized controlled study of temozolomide versus semustine in the treatment of recurrent malignant glioma]. *Zhonghua Yi Xue Za Zhi* 2013;93(3):165-8. [published Online First: 2013/04/11]
98. Cunningham D, Zalcborg JR, Rath U, et al. Final results of a randomised trial comparing 'Tomudex' (raltitrexed) with 5-fluorouracil plus leucovorin in advanced colorectal cancer. "Tomudex" Colorectal Cancer Study Group. *Ann Oncol* 1996;7(9):961-5. doi: 10.1093/oxfordjournals.annonc.a010800 [published Online First: 1996/11/01]
99. Cocconi G, Cunningham D, Van Cutsem E, et al. Open, randomized, multicenter trial of raltitrexed versus fluorouracil plus high-dose leucovorin in patients with advanced colorectal cancer. Tomudex Colorectal Cancer Study Group. *J Clin Oncol* 1998;16(9):2943-52. doi: 10.1200/jco.1998.16.9.2943 [published Online First: 1998/09/17]
100. Jia-lei W, Jin L, Shu-kui Q, et al. Randomized multicenter phase III trial of oxaliplatin plus raltitrexed versus oxaliplatin plus fluorouracil and leucovorin for advanced colorectal cancer. *Chinese Clinical Oncology* 2012;17(01):6-11.
101. Cunningham D, Humblet Y, Siena S, et al. Cetuximab monotherapy and cetuximab plus irinotecan in irinotecan-refractory metastatic colorectal cancer. *N Engl J Med* 2004;351(4):337-45. doi: 10.1056/NEJMoa033025 [published Online First: 2004/07/23]
102. Schlumberger M, Tahara M, Wirth LJ, et al. Lenvatinib versus placebo in radioiodine-refractory thyroid cancer. *N Engl J Med* 2015;372(7):621-30. doi: 10.1056/NEJMoa1406470 [published Online First: 2015/02/12]
103. Brose MS, Nutting CM, Jarzab B, et al. Sorafenib in radioactive iodine-refractory, locally advanced or metastatic differentiated thyroid cancer: a randomised, double-blind, phase 3 trial. *Lancet* 2014;384(9940):319-28. doi: 10.1016/s0140-6736(14)60421-9 [published Online First: 2014/04/29]



104. Yao JC, Fazio N, Singh S, et al. Everolimus for the treatment of advanced, non-functional neuroendocrine tumours of the lung or gastrointestinal tract (RADIANT-4): a randomised, placebo-controlled, phase 3 study. *Lancet* 2016;387(10022):968-77. doi: 10.1016/s0140-6736(15)00817-x [published Online First: 2015/12/26]
105. Yao JC, Shah MH, Ito T, et al. Everolimus for advanced pancreatic neuroendocrine tumors. *N Engl J Med* 2011;364(6):514-23. doi: 10.1056/NEJMoa1009290 [published Online First: 2011/02/11]
106. Yao JC, Pavel M, Lombard-Bohas C, et al. Everolimus for the Treatment of Advanced Pancreatic Neuroendocrine Tumors: Overall Survival and Circulating Biomarkers From the Randomized, Phase III RADIANT-3 Study. *J Clin Oncol* 2016;34(32):3906-13. doi: 10.1200/jco.2016.68.0702 [published Online First: 2016/09/14]
107. Moore K, Colombo N, Scambia G, et al. Maintenance Olaparib in Patients with Newly Diagnosed Advanced Ovarian Cancer. *N Engl J Med* 2018;379(26):2495-505. doi: 10.1056/NEJMoa1810858 [published Online First: 2018/10/23]
108. Kudo M, Finn RS, Qin S, et al. Lenvatinib versus sorafenib in first-line treatment of patients with unresectable hepatocellular carcinoma: a randomised phase 3 non-inferiority trial. *Lancet* 2018;391(10126):1163-73. doi: 10.1016/s0140-6736(18)30207-1 [published Online First: 2018/02/13]
109. Dreyling M, Jurczak W, Jerkeman M, et al. Ibrutinib versus temsirolimus in patients with relapsed or refractory mantle-cell lymphoma: an international, randomised, open-label, phase 3 study. *Lancet* 2016;387(10020):770-8. doi: 10.1016/s0140-6736(15)00667-4 [published Online First: 2015/12/18]
110. Dimopoulos MA, Tedeschi A, Trotman J, et al. Phase 3 Trial of Ibrutinib plus Rituximab in Waldenström's Macroglobulinemia. *N Engl J Med* 2018;378(25):2399-410. doi: 10.1056/NEJMoa1802917 [published Online First: 2018/06/02]
111. Kantarjian H, Issa JP, Rosenfeld CS, et al. Decitabine improves patient outcomes in myelodysplastic syndromes: results of a phase III randomized study. *Cancer* 2006;106(8):1794-803. doi: 10.1002/cncr.21792 [published Online First: 2006/03/15]
112. Demetri GD, Reichardt P, Kang YK, et al. Efficacy and safety of regorafenib for advanced gastrointestinal stromal tumours after failure of imatinib and sunitinib (GRID): an international, multicentre, randomised, placebo-controlled, phase 3 trial. *Lancet* 2013;381(9863):295-302. doi: 10.1016/s0140-6736(12)61857-1 [published Online First: 2012/11/28]
113. Silverman LR, Demakos EP, Peterson BL, et al. Randomized controlled trial of azacitidine in patients with the myelodysplastic syndrome: a study of the cancer and leukemia group B. *J Clin Oncol* 2002;20(10):2429-40. doi: 10.1200/jco.2002.04.117 [published Online First: 2002/05/16]
114. Kantarjian H, Pasquini R, Lévy V, et al. Dasatinib or high-dose imatinib for chronic-phase chronic myeloid leukemia resistant to imatinib at a dose of 400 to 600 milligrams daily: two-year follow-up of a randomized phase 2 study (START-R). *Cancer* 2009;115(18):4136-47. doi: 10.1002/cncr.24504 [published Online First: 2009/06/19]
115. Klotz L, Boccon-Gibod L, Shore ND, et al. The efficacy and safety of degarelix: a 12-month, comparative, randomized, open-label, parallel-group phase III study in patients with prostate cancer. *BJU Int* 2008;102(11):1531-8. doi: 10.1111/j.1464-410X.2008.08183.x [published Online First: 2008/11/28]

116. Osborne CK, Pippen J, Jones SE, et al. Double-blind, randomized trial comparing the efficacy and tolerability of fulvestrant versus anastrozole in postmenopausal women with advanced breast cancer progressing on prior endocrine therapy: results of a North American trial. *J Clin Oncol* 2002;20(16):3386-95. doi: 10.1200/jco.2002.10.058 [published Online First: 2002/08/15]
117. Xu B, Jiang Z, Shao Z, et al. Fulvestrant 250 mg versus anastrozole for Chinese patients with advanced breast cancer: results of a multicentre, double-blind, randomised phase III trial. *Cancer Chemother Pharmacol* 2011;67(1):223-30. doi: 10.1007/s00280-010-1483-x [published Online First: 2010/10/13]
118. Martin M, Holmes FA, Ejlertsen B, et al. Neratinib after trastuzumab-based adjuvant therapy in HER2-positive breast cancer (ExteNET): 5-year analysis of a randomised, double-blind, placebo-controlled, phase 3 trial. *Lancet Oncol* 2017;18(12):1688-700. doi: 10.1016/s1470-2045(17)30717-9 [published Online First: 2017/11/18]
119. Iwata H, Masuda N, Kim SB, et al. Neratinib after trastuzumab-based adjuvant therapy in patients from Asia with early stage HER2-positive breast cancer. *Future Oncol* 2019;15(21):2489-501. doi: 10.2217/fon-2019-0143 [published Online First: 2019/05/30]
120. Hughes TP, Lipton JH, Spector N, et al. Deep molecular responses achieved in patients with CML-CP who are switched to nilotinib after long-term imatinib. *Blood* 2014;124(5):729-36. doi: 10.1182/blood-2013-12-544015 [published Online First: 2014/06/21]
121. Wang J, Shen ZX, Saglio G, et al. Phase 3 study of nilotinib vs imatinib in Chinese patients with newly diagnosed chronic myeloid leukemia in chronic phase: ENESTchina. *Blood* 2015;125(18):2771-8. doi: 10.1182/blood-2014-09-601674 [published Online First: 2015/03/15]
122. Saglio G, Kim DW, Issaragrisil S, et al. Nilotinib versus imatinib for newly diagnosed chronic myeloid leukemia. *N Engl J Med* 2010;362(24):2251-9. doi: 10.1056/NEJMoa0912614 [published Online First: 2010/06/08]
123. Kantarjian HM, Hochhaus A, Saglio G, et al. Nilotinib versus imatinib for the treatment of patients with newly diagnosed chronic phase, Philadelphia chromosome-positive, chronic myeloid leukaemia: 24-month minimum follow-up of the phase 3 randomised ENESTnd trial. *Lancet Oncol* 2011;12(9):841-51. doi: 10.1016/s1470-2045(11)70201-7 [published Online First: 2011/08/23]
124. Gianni L, Pienkowski T, Im YH, et al. Efficacy and safety of neoadjuvant pertuzumab and trastuzumab in women with locally advanced, inflammatory, or early HER2-positive breast cancer (NeoSphere): a randomised multicentre, open-label, phase 2 trial. *Lancet Oncol* 2012;13(1):25-32. doi: 10.1016/s1470-2045(11)70336-9 [published Online First: 2011/12/14]
125. Gianni L, Pienkowski T, Im YH, et al. 5-year analysis of neoadjuvant pertuzumab and trastuzumab in patients with locally advanced, inflammatory, or early-stage HER2-positive breast cancer (NeoSphere): a multicentre, open-label, phase 2 randomised trial. *Lancet Oncol* 2016;17(6):791-800. doi: 10.1016/s1470-2045(16)00163-7 [published Online First: 2016/05/18]
126. Shao Z, Pang D, Yang H, et al. Efficacy, Safety, and Tolerability of Pertuzumab, Trastuzumab, and Docetaxel for Patients With Early or Locally Advanced ERBB2-Positive Breast Cancer in Asia: The PEONY Phase 3 Randomized Clinical Trial. *JAMA Oncol* 2020;6(3):e193692. doi: 10.1001/jamaoncol.2019.3692 [published Online First: 2019/10/28]

127. Finn RS, Martin M, Rugo HS, et al. Palbociclib and Letrozole in Advanced Breast Cancer. *N Engl J Med* 2016;375(20):1925-36. doi: 10.1056/NEJMoa1607303 [published Online First: 2016/12/14]
128. Jiang Z, Li W, Hu X, et al. Tucidinostat plus exemestane for postmenopausal patients with advanced, hormone receptor-positive breast cancer (ACE): a randomised, double-blind, placebo-controlled, phase 3 trial. *Lancet Oncol* 2019;20(6):806-15. doi: 10.1016/s1470-2045(19)30164-0 [published Online First: 2019/05/01]
129. Bian L, Xu BH, Di LJ, et al. [Phase III randomized controlled, multicenter, prospective study of recombinant anti-HER2 humanized monoclonal antibody (Cipterbin) combined with vinorelbine in patients with HER2 positive metastatic breast cancer: the HOPES Study]. *Zhonghua Yi Xue Za Zhi* 2020;100(30):2351-57. doi: 10.3760/cma.j.cn112137-20200116-00105 [published Online First: 2020/08/15]
130. Xu J, Shen L, Zhou Z, et al. Surufatinib in advanced extrapancreatic neuroendocrine tumours (SANET-ep): a randomised, double-blind, placebo-controlled, phase 3 study. *Lancet Oncol* 2020;21(11):1500-12. doi: 10.1016/s1470-2045(20)30496-4 [published Online First: 2020/09/24]
131. Hu X, Zhang L, Shi Y, et al. The Efficacy and Safety of Icotinib in Patients with Advanced Non-Small Cell Lung Cancer Previously Treated with Chemotherapy: A Single-Arm, Multi-Center, Prospective Study. *PLoS One* 2015;10(11):e0142500. doi: 10.1371/journal.pone.0142500 [published Online First: 2015/11/26]
132. Thomas D, Henshaw R, Skubitz K, et al. Denosumab in patients with giant-cell tumour of bone: an open-label, phase 2 study. *Lancet Oncol* 2010;11(3):275-80. doi: 10.1016/s1470-2045(10)70010-3 [published Online First: 2010/02/13]
133. Yang Y, Zhou J, Zhou J, et al. Efficacy, safety, and biomarker analysis of ensartinib in crizotinib-resistant, ALK-positive non-small-cell lung cancer: a multicentre, phase 2 trial. *Lancet Respir Med* 2020;8(1):45-53. doi: 10.1016/s2213-2600(19)30252-8 [published Online First: 2019/10/20]
134. Ye D, Liu J, Zhou A, et al. Tislelizumab in Asian patients with previously treated locally advanced or metastatic urothelial carcinoma. *Cancer Sci* 2021;112(1):305-13. doi: 10.1111/cas.14681 [published Online First: 2020/10/14]
135. Qin S, Ren Z, Meng Z, et al. Camrelizumab in patients with previously treated advanced hepatocellular carcinoma: a multicentre, open-label, parallel-group, randomised, phase 2 trial. *Lancet Oncol* 2020;21(4):571-80. doi: 10.1016/s1470-2045(20)30011-5 [published Online First: 2020/03/01]
136. Tang B, Chi Z, Chen Y, et al. Safety, Efficacy, and Biomarker Analysis of Toripalimab in Previously Treated Advanced Melanoma: Results of the POLARIS-01 Multicenter Phase II Trial. *Clin Cancer Res* 2020;26(16):4250-59. doi: 10.1158/1078-0432.Ccr-19-3922 [published Online First: 2020/04/24]
137. Fisher RI, Bernstein SH, Kahl BS, et al. Multicenter phase II study of bortezomib in patients with relapsed or refractory mantle cell lymphoma. *J Clin Oncol* 2006;24(30):4867-74. doi: 10.1200/jco.2006.07.9665 [published Online First: 2006/09/27]
138. Song Y, Gao Q, Zhang H, et al. Treatment of relapsed or refractory classical Hodgkin lymphoma with the anti-PD-1, tislelizumab: results of a phase 2, single-arm, multicenter study. *Leukemia* 2020;34(2):533-42. doi: 10.1038/s41375-019-0545-2 [published Online First: 2019/09/15]

139. Pro B, Advani R, Brice P, et al. Brentuximab vedotin (SGN-35) in patients with relapsed or refractory systemic anaplastic large-cell lymphoma: results of a phase II study. *J Clin Oncol* 2012;30(18):2190-6. doi: 10.1200/jco.2011.38.0402 [published Online First: 2012/05/23]
140. Song Y, Zhou K, Zou D, et al. Treatment of Patients with Relapsed or Refractory Mantle-Cell Lymphoma with Zanubrutinib, a Selective Inhibitor of Bruton's Tyrosine Kinase. *Clin Cancer Res* 2020;26(16):4216-24. doi: 10.1158/1078-0432.Ccr-19-3703 [published Online First: 2020/05/29]
141. Xu W, Yang S, Zhou K, et al. Treatment of relapsed/refractory chronic lymphocytic leukemia/small lymphocytic lymphoma with the BTK inhibitor zanubrutinib: phase 2, single-arm, multicenter study. *J Hematol Oncol* 2020;13(1):48. doi: 10.1186/s13045-020-00884-4 [published Online First: 2020/05/13]
142. Shi Y, Su H, Song Y, et al. Safety and activity of sintilimab in patients with relapsed or refractory classical Hodgkin lymphoma (ORIENT-1): a multicentre, single-arm, phase 2 trial. *Lancet Haematol* 2019;6(1):e12-e19. doi: 10.1016/s2352-3026(18)30192-3 [published Online First: 2019/01/08]
143. DiNardo CD, Pratz KW, Letai A, et al. Safety and preliminary efficacy of venetoclax with decitabine or azacitidine in elderly patients with previously untreated acute myeloid leukaemia: a non-randomised, open-label, phase 1b study. *Lancet Oncol* 2018;19(2):216-28. doi: 10.1016/s1470-2045(18)30010-x [published Online First: 2018/01/18]
144. Hong X, Song Y, Huang H, et al. Pralatrexate in Chinese Patients with Relapsed or Refractory Peripheral T-cell Lymphoma: A Single-arm, Multicenter Study. *Target Oncol* 2019;14(2):149-58. doi: 10.1007/s11523-019-00630-y [published Online First: 2019/03/25]
145. Walewski J, Hellmann A, Siritanaratkul N, et al. Prospective study of brentuximab vedotin in relapsed/refractory Hodgkin lymphoma patients who are not suitable for stem cell transplant or multi-agent chemotherapy. *Br J Haematol* 2018;183(3):400-10. doi: 10.1111/bjh.15539 [published Online First: 2018/09/01]
146. Kantarjian HM, Giles F, Gattermann N, et al. Nilotinib (formerly AMN107), a highly selective BCR-ABL tyrosine kinase inhibitor, is effective in patients with Philadelphia chromosome-positive chronic myelogenous leukemia in chronic phase following imatinib resistance and intolerance. *Blood* 2007;110(10):3540-6. doi: 10.1182/blood-2007-03-080689 [published Online First: 2007/08/24]
147. Lonial S, Weiss BM, Usmani SZ, et al. Daratumumab monotherapy in patients with treatment-refractory multiple myeloma (SIRIUS): an open-label, randomised, phase 2 trial. *Lancet* 2016;387(10027):1551-60. doi: 10.1016/s0140-6736(15)01120-4 [published Online First: 2016/01/19]
148. Haslam A, Hey SP, Gill J, et al. A systematic review of trial-level meta-analyses measuring the strength of association between surrogate end-points and overall survival in oncology. *Eur J Cancer* 2019;106:196-211. doi: 10.1016/j.ejca.2018.11.012 [published Online First: 2018/12/12]
149. Hotta K, Suzuki E, Di Maio M, et al. Progression-free survival and overall survival in phase III trials of molecular-targeted agents in advanced non-small-cell lung cancer. *Lung Cancer* 2013;79(1):20-6. doi: 10.1016/j.lungcan.2012.10.007 [published Online First: 2012/11/21]
150. Hotta K, Kato Y, Leighl N, et al. Magnitude of the benefit of progression-free survival as a potential surrogate marker in phase 3 trials assessing targeted agents in molecularly selected patients with advanced non-small cell lung cancer: systematic review. *PLoS One* 2015;10(3):e0121211. doi: 10.1371/journal.pone.0121211 [published Online First: 2015/03/17]

151. Aboshi M, Kaneko M, Narukawa M. Factors affecting the association between overall survival and progression-free survival in clinical trials of first-line treatment for patients with advanced non-small cell lung cancer. *J Cancer Res Clin Oncol* 2014;140(5):839-48. doi: 10.1007/s00432-014-1617-3 [published Online First: 2014/02/25]
152. Suzuki H, Hirashima T, Okamoto N, et al. Relationship between progression-free survival and overall survival in patients with advanced non-small cell lung cancer treated with anticancer agents after first-line treatment failure. *Asia Pac J Clin Oncol* 2015;11(2):121-8. doi: 10.1111/ajco.12199 [published Online First: 2014/05/09]
153. Ng R, Pond GR, Tang PA, et al. Correlation of changes between 2-year disease-free survival and 5-year overall survival in adjuvant breast cancer trials from 1966 to 2006. *Ann Oncol* 2008;19(3):481-6. doi: 10.1093/annonc/mdm486 [published Online First: 2007/11/22]
154. Berruti A, Amoroso V, Gallo F, et al. Pathologic complete response as a potential surrogate for the clinical outcome in patients with breast cancer after neoadjuvant therapy: a meta-regression of 29 randomized prospective studies. *J Clin Oncol* 2014;32(34):3883-91. doi: 10.1200/jco.2014.55.2836 [published Online First: 2014/10/29]
155. Cortazar P, Zhang L, Untch M, et al. Pathological complete response and long-term clinical benefit in breast cancer: the CTNeoBC pooled analysis. *Lancet* 2014;384(9938):164-72. doi: 10.1016/s0140-6736(13)62422-8 [published Online First: 2014/02/18]
156. Petrelli F, Barni S. Surrogate endpoints in metastatic breast cancer treated with targeted therapies: an analysis of the first-line phase III trials. *Med Oncol* 2014;31(1):776. doi: 10.1007/s12032-013-0776-4 [published Online First: 2013/11/26]
157. Adunlin G, Cyrus JW, Dranitsaris G. Correlation between progression-free survival and overall survival in metastatic breast cancer patients receiving anthracyclines, taxanes, or targeted therapies: a trial-level meta-analysis. *Breast Cancer Res Treat* 2015;154(3):591-608. doi: 10.1007/s10549-015-3643-5 [published Online First: 2015/11/26]
158. Wilkerson J, Fojo T. Progression-free survival is simply a measure of a drug's effect while administered and is not a surrogate for overall survival. *Cancer J* 2009;15(5):379-85. doi: 10.1097/PPO.0b013e3181bef8cd [published Online First: 2009/10/15]
159. Sherrill B, Amonkar M, Wu Y, et al. Relationship between effects on time-to-disease progression and overall survival in studies of metastatic breast cancer. *Br J Cancer* 2008;99(10):1572-8. doi: 10.1038/sj.bjc.6604759 [published Online First: 2008/11/13]
160. Beauchemin C, Cooper D, Lapierre M, et al. Progression-free survival as a potential surrogate for overall survival in metastatic breast cancer. *Onco Targets Ther* 2014;7:1101-10. doi: 10.2147/ott.S63302 [published Online First: 2014/06/28]
161. Liu L, Chen F, Zhao J, et al. Correlation between overall survival and other endpoints in metastatic breast cancer with second- or third-line chemotherapy: Literature-based analysis of 24 randomized trials. *Bull Cancer* 2016;103(4):336-44. doi: 10.1016/j.bulcan.2016.01.002 [published Online First: 2016/02/15]
162. Petrelli F, Barni S. Surrogate end points and postprogression survival in renal cell carcinoma: an analysis of first-line trials with targeted therapies. *Clin Genitourin Cancer* 2013;11(4):385-9. doi: 10.1016/j.clgc.2013.07.012 [published Online First: 2013/10/08]

163. Bria E, Massari F, Maines F, et al. Progression-free survival as primary endpoint in randomized clinical trials of targeted agents for advanced renal cell carcinoma. Correlation with overall survival, benchmarking and power analysis. *Crit Rev Oncol Hematol* 2015;93(1):50-9. doi: 10.1016/j.critrevonc.2014.08.001 [published Online First: 2014/09/10]
164. Delea TE, Khuu A, Heng DY, et al. Association between treatment effects on disease progression end points and overall survival in clinical studies of patients with metastatic renal cell carcinoma. *Br J Cancer* 2012;107(7):1059-68. doi: 10.1038/bjc.2012.367 [published Online First: 2012/09/01]
165. Johnson KR, Liauw W, Lassere MN. Evaluating surrogacy metrics and investigating approval decisions of progression-free survival (PFS) in metastatic renal cell cancer: a systematic review. *Ann Oncol* 2015;26(3):485-96. doi: 10.1093/annonc/mdu267 [published Online First: 2014/07/25]
166. Ciani O, Buyse M, Garside R, et al. Meta-analyses of randomized controlled trials show suboptimal validity of surrogate outcomes for overall survival in advanced colorectal cancer. *J Clin Epidemiol* 2015;68(7):833-42. doi: 10.1016/j.jclinepi.2015.02.016 [published Online First: 2015/04/13]
167. Sidhu R, Rong A, Dahlberg S. Evaluation of progression-free survival as a surrogate endpoint for survival in chemotherapy and targeted agent metastatic colorectal cancer trials. *Clin Cancer Res* 2013;19(5):969-76. doi: 10.1158/1078-0432.Ccr-12-2502 [published Online First: 2013/01/11]
168. Chirila C, Odom D, Devercelli G, et al. Meta-analysis of the association between progression-free survival and overall survival in metastatic colorectal cancer. *Int J Colorectal Dis* 2012;27(5):623-34. doi: 10.1007/s00384-011-1349-7 [published Online First: 2011/11/15]
169. Giessen C, Laubender RP, Ankerst DP, et al. Surrogate endpoints in second-line treatment for mCRC: a systematic literature-based analysis from 23 randomised trials. *Acta Oncol* 2015;54(2):187-93. doi: 10.3109/0284186x.2014.938830 [published Online First: 2014/07/16]
170. Cremolini C, Antoniotti C, Pietrantonio F, et al. Surrogate Endpoints in Second-Line Trials of Targeted Agents in Metastatic Colorectal Cancer: A Literature-Based Systematic Review and Meta-Analysis. *Cancer Res Treat* 2017;49(3):834-45. doi: 10.4143/crt.2016.249 [published Online First: 2016/11/20]
171. Siddiqui MK, Tyczynski J, Pahwa A, et al. Objective response rate is a possible surrogate endpoint for survival in patients with advanced, recurrent ovarian cancer. *Gynecol Oncol* 2017;146(1):44-51. doi: 10.1016/j.ygyno.2017.03.515 [published Online First: 2017/04/12]
172. Abdel-Rahman O. Surrogate end points for overall survival in trials of PD-(L)1 inhibitors for urinary cancers: a systematic review. *Immunotherapy* 2018;10(2):139-48. doi: 10.2217/imt-2017-0115 [published Online First: 2017/12/21]
173. Xie W, Regan MM, Buyse M, et al. Metastasis-Free Survival Is a Strong Surrogate of Overall Survival in Localized Prostate Cancer. *J Clin Oncol* 2017;35(27):3097-104. doi: 10.1200/jco.2017.73.9987 [published Online First: 2017/08/11]
174. Smith MR, Mehra M, Nair S, et al. Relationship Between Metastasis-free Survival and Overall Survival in Patients With Nonmetastatic Castration-resistant Prostate Cancer. *Clin Genitourin Cancer* 2020;18(2):e180-e89. doi: 10.1016/j.clgc.2019.10.030 [published Online First: 2020/01/26]
175. Sheth M, Ko J. Exploring the relationship between Overall Survival (OS), Progression Free Survival (PFS) and Objective Response Rate (ORR) in patients with advanced melanoma. *Cancer Treat Res Commun* 2021;26:100272. doi: 10.1016/j.ctarc.2020.100272 [published Online First: 2020/12/19]

176. Nie RC, Yuan SQ, Wang Y, et al. Surrogate endpoints for overall survival in anti-programmed death-1 and anti-programmed death ligand 1 trials of advanced melanoma. *Ther Adv Med Oncol* 2020;12:1758835920929583. doi: 10.1177/1758835920929583 [published Online First: 2020/07/01]
177. Penel N, Cousin S, Duhamel A, et al. Activity endpoints reported in soft tissue sarcoma phase II trials: quality of reported endpoints and correlation with overall survival. *Crit Rev Oncol Hematol* 2013;88(2):309-17. doi: 10.1016/j.critrevonc.2013.05.004 [published Online First: 2013/05/28]
178. Tykocki T, Eltayeb M. Ten-year survival in glioblastoma. A systematic review. *J Clin Neurosci* 2018;54:7-13. doi: 10.1016/j.jocn.2018.05.002 [published Online First: 2018/05/29]
179. Ballman KV, Buckner JC, Brown PD, et al. The relationship between six-month progression-free survival and 12-month overall survival end points for phase II trials in patients with glioblastoma multiforme. *Neuro Oncol* 2007;9(1):29-38. doi: 10.1215/15228517-2006-025 [published Online First: 2006/11/17]
180. Llovet JM, Montal R, Villanueva A. Randomized trials and endpoints in advanced HCC: Role of PFS as a surrogate of survival. *J Hepatol* 2019;70(6):1262-77. doi: 10.1016/j.jhep.2019.01.028 [published Online First: 2019/04/04]
181. Xu H, Cao D, Zheng Y, et al. Potential predictors for survival in hepatocellular carcinoma patients treated with immune checkpoint inhibitors: A meta-analysis. *Int Immunopharmacol* 2021;100:108135. doi: 10.1016/j.intimp.2021.108135 [published Online First: 2021/09/17]
